# Supplementary material for: Mycorrhizal Fungal Partners Remain Constant during a Root Lifecycle of Pleione bulbocodioides (Orchidaceae)
Source: MDPI journal article supplement (doi:10.3390/jof7110994), 2021-11-22
Supplement: s1 [file s1]

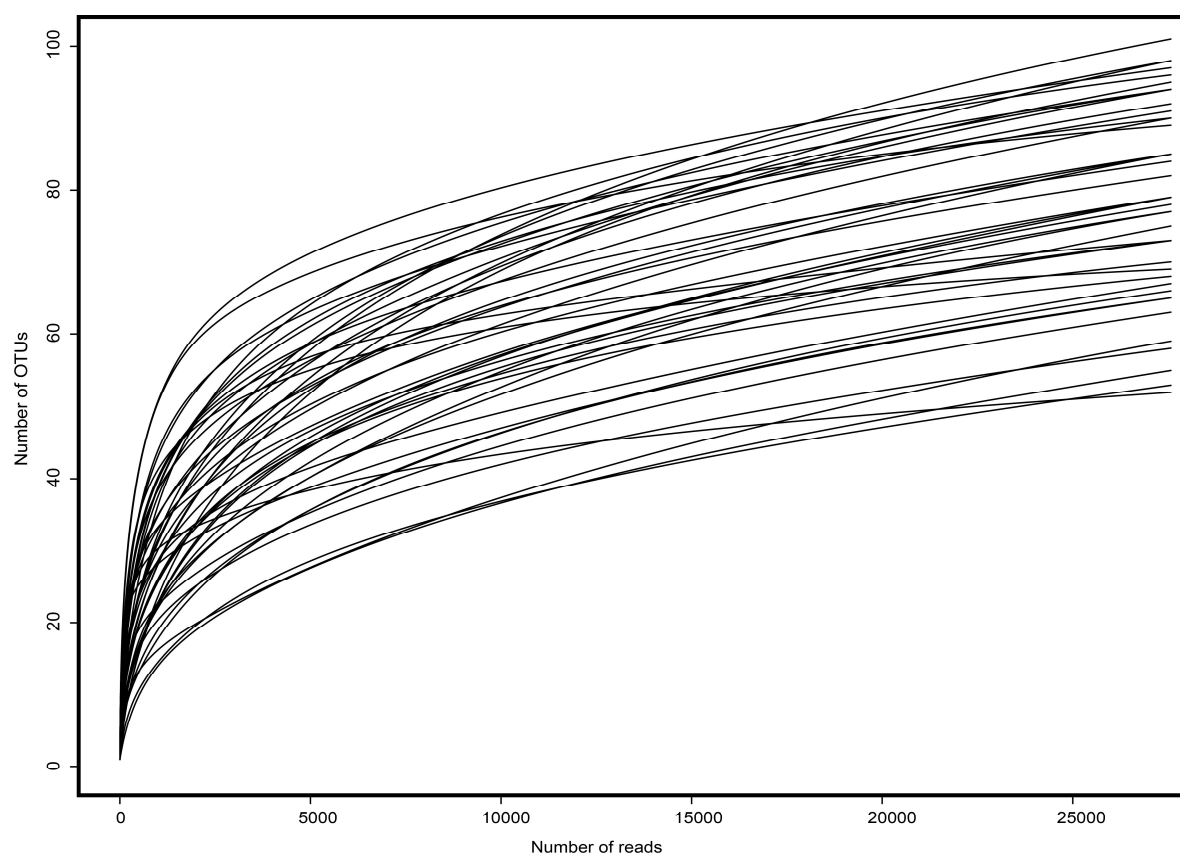

**Figure S1.** The OTU accumulation curves for each sample, plotted using the function *rarecurve* from the R package “vegan”.

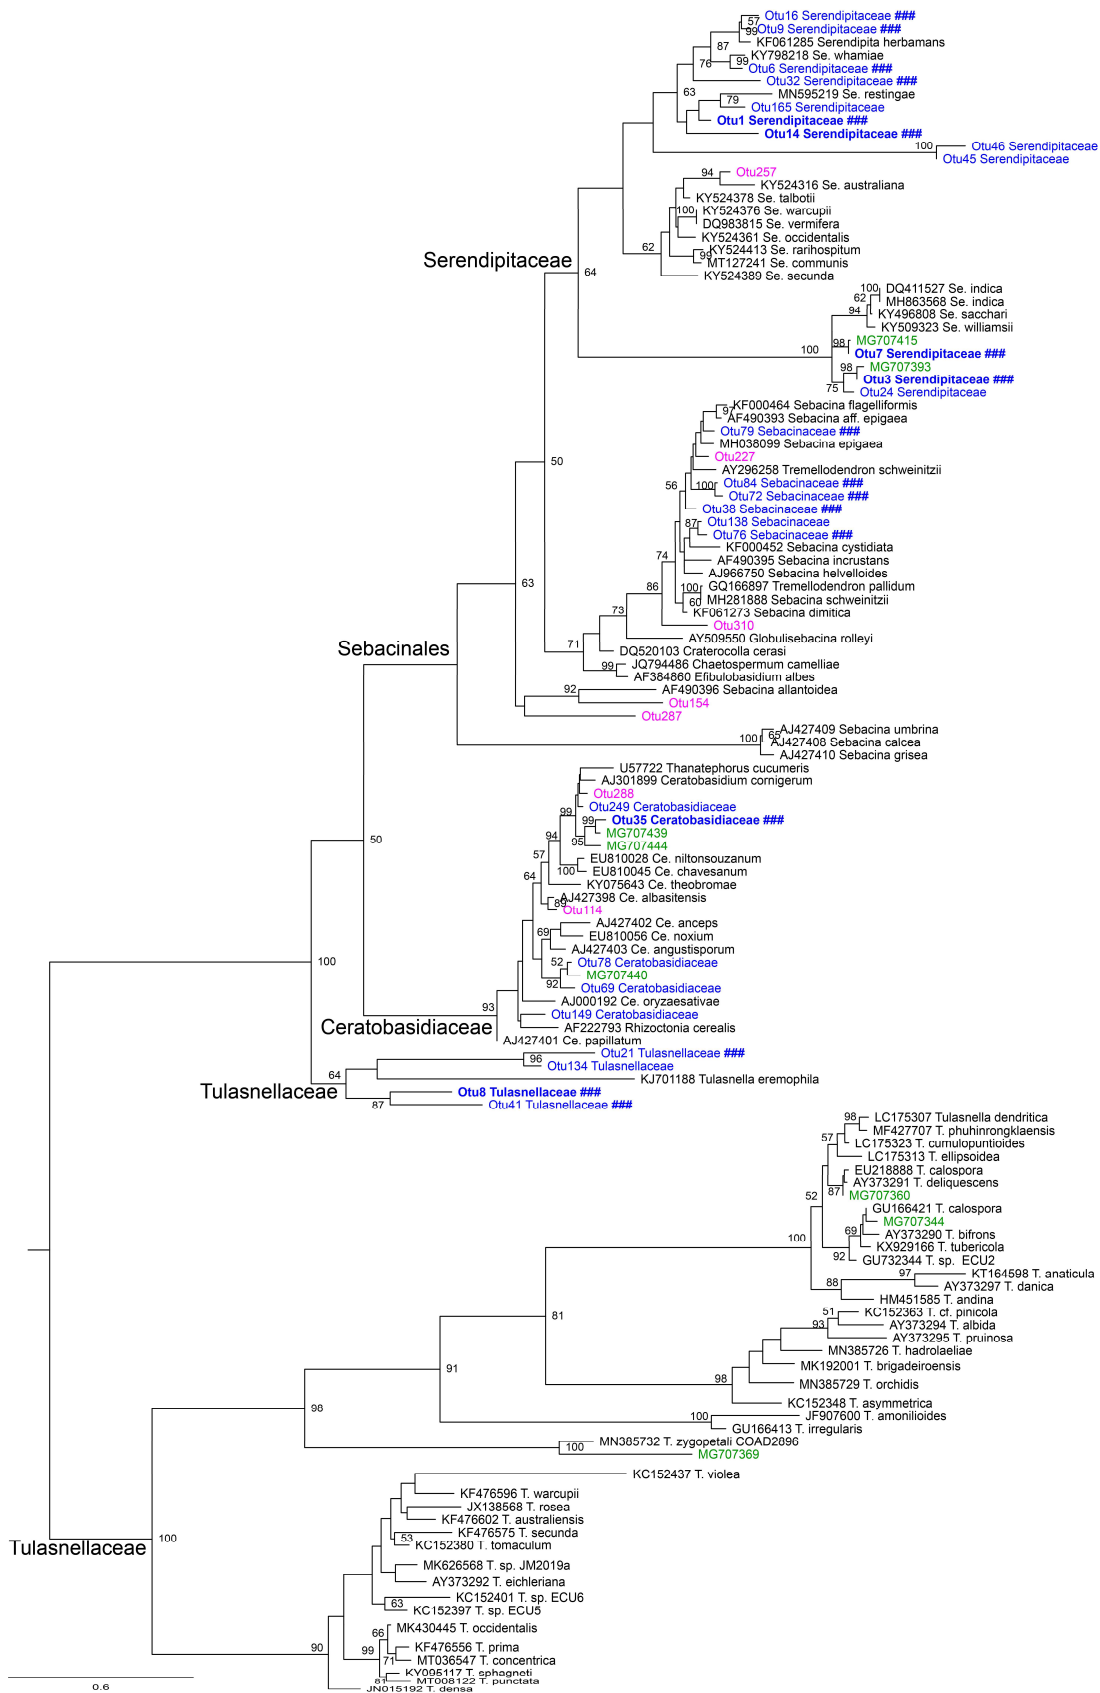

**Figure S2.** The phylogenetic tree of rhizoctonia fungi inferred from ITS2 sequences. Bootstrap values ( $\geq 50$ ) are shown along nodes. Blue texture indicates mycorrhizal fungi of *Pleione bulbocodioides* detected in this study. Boldface and ### show the MF detected from  $\geq 38$  (90% of the total) individuals and those shared by 7 age groups. Green shows the OMF of *P. bulbocodioides* reported in one previous study [44]. Pink shows rhizoctonia fungi detected in  $\leq 5$  individuals (as opportunists) in this study.
