# Supplementary material for: Mycorrhizal Fungal Partners Remain Constant during a Root Lifecycle of Pleione bulbocodioides (Orchidaceae)
Source: J Fungi (Basel). 2021 Nov 22;7(11):994. doi: 10.3390/jof7110994 (PMC8621020; doi:10.3390/jof7110994)
Supplement: Supplementary file 1 [file jof-07-00994-s001.zip › jof-1443389-supplementary table 1 Detailed information of each fungal OTU detected in this study..xlsx]

## Sheet: Rhizoctonia
rhizoctonia fungal OTUs detected from Pleione bulbocoidoides
Classification	plant individual number	blasthit	lineage	Identity		#OTU	pb1	pb2	pb3	pb4	pb5	pb6	pb13	pb14	pb15	pb16	pb17	pb18	pb25	pb26	pb27	pb28	pb29	pb30	pb37	pb38	pb39	pb40	pb41	pb42	pb49	pb50	pb51	pb52	pb53	pb54	pb61	pb62	pb63	pb64	pb65	pb66	pb73	pb74	pb75	pb76	pb77	pb78
Mycorrhizal	42	KF574237	Serendipitaceae	97.586	OK165459	Otu1	15	144	637	623	554	537	177	20755	1004	26690	25604	20527	325	387	159	577	346	395	531	4002	299	18480	829	1901	6393	534	154	2025	100	926	811	258	1059	413	3767	25863	22369	14473	577	8903	18170	526
Mycorrhizal	41	AY634118	Serendipitaceae	98.913	OK165460	Otu3	50	0	16922	140	239	429	245	446	24121	45	521	105	93	226	14021	14563	423	99	6789	4828	157	337	23806	11175	578	204	21673	115	1529	16067	388	375	593	89	298	35	23	120	185	11617	448	13
Mycorrhizal	30	HQ154349	Serendipitaceae	98.671	OK165461	Otu6	0	0	0	0	116	80	3	0	1	1	42	40	259	15503	35	41	48	15	54	54	25384	159	664	57	42	54	0	0	73	52	0	0	2	0	1	1	73	76	3	1	0	0
Mycorrhizal	42	EU490142	Serendipitaceae	93.863	OK165462	Otu7	27	29	8	227	5	1	5	2	206	50	5	6	3	5	6	3	150	94	13	8	4	4	1	8	200	177	413	203	248	235	327	323	23814	24798	2	53	2	3	3	1	140	86
Mycorrhizal	20	AB712286	Serendipitaceae	99.662	OK165463	Otu9	0	0	64	1	0	0	0	1	2	0	85	0	0	0	1	0	0	0	16946	97	77	81	70	142	88	135	70	0	0	1	0	1	0	0	74	0	0	1	0	0	0	1
Mycorrhizal	41	AB712288	Serendipitaceae	98.305	OK165464	Otu14	0	1	124	368	185	162	26158	187	142	37	3	6	8	2	463	6	2	5	4	10	6	6	556	6	4	9	3	3	2	1	471	5	3	2	4	5	7	2	663	6	4	6
Mycorrhizal	34	GU189685	Serendipitaceae	94.295	OK165465	Otu16	0	3	2	1	5	1	0	2	0	18	1	4	4	1	0	3	1	72	246	210	196	102	183	268	99	21103	1	3	646	1	5	4	1	22	0	0	9	0	1	4	0	44
Mycorrhizal	13	AY634118	Serendipitaceae	94.565	OK165466	Otu24	0	0	0	0	15	0	0	0	0	0	10	4	2846	9	14	6	11	2	0	0	16	0	0	0	0	0	1	0	16	0	0	0	0	0	0	0	14	0	0	0	0	0
Mycorrhizal	14	AB520599	Serendipitaceae	96.959	OK165467	Otu32	0	0	0	0	0	11	0	0	1	0	0	0	0	12	0	0	0	0	0	0	0	13	0	0	0	0	0	0	0	11	0	0	1	0	7	4	9	2411	8	8	67	11
Mycorrhizal	12	KJ188472	Serendipitaceae	89.535	OK165468	Otu45	0	0	0	7	0	0	0	0	0	0	0	13	0	0	0	0	0	0	0	15	0	0	0	0	0	0	2	1373	2	1	9	3	7	3	0	3	0	0	0	0	0	0
Mycorrhizal	13	AJ744855	Serendipitaceae	95.588	OK165469	Otu46	0	0	1	6	0	0	0	0	0	0	0	8	0	0	1	0	0	0	2	15	0	0	0	0	0	0	4	1313	0	0	3	6	4	1	0	8	0	0	0	0	0	0
Mycorrhizal	8	FN663141	Serendipitaceae	97.426	OK165470	Otu165	0	0	0	0	0	0	0	0	1	0	2	0	2	2	1	1	148	1	0	0	0	0	0	0	0	0	0	0	0	0	0	0	0	0	0	0	0	0	0	0	0	0
Mycorrhizal	20	HQ154331	Sebacinaceae	97.945	OK165471	Otu38	5270	9	0	3	1	0	2	0	46	0	0	2	1	12	0	0	46	0	3	0	0	0	1	0	50	0	0	1	0	0	0	0	25	0	1	1	1	107	0	0	65	0
Mycorrhizal	17	EU910925	Sebacinaceae	95.486	OK165472	Otu72	0	43	2	0	2	1112	3	5	2	2	0	0	0	11	0	0	0	0	0	0	0	12	0	0	2	1	2	0	0	7	0	9	0	1	0	0	0	3	0	0	0	0
Mycorrhizal	11	JF748118	Sebacinaceae	97.288	OK165473	Otu76	7	1136	0	0	0	0	0	0	0	4	0	0	0	1	0	0	0	5	0	0	1	0	1	0	0	13	0	0	0	0	0	0	0	7	1	0	0	0	0	0	0	5
Mycorrhizal	18	LC013795	Sebacinaceae	94.915	OK165474	Otu79	1	171	1	359	0	2	0	78	2	1	0	7	0	0	0	3	0	3	0	6	0	0	0	2	0	0	0	6	0	0	0	1	0	0	0	5	0	28	0	2	0	0
Mycorrhizal	19	UDB026864	Sebacinaceae	90.94	OK165475	Otu84	0	597	2	60	0	0	0	1	0	8	12	2	0	1	0	1	0	3	0	2	1	0	0	0	0	2	1	2	0	0	0	6	0	2	1	0	0	0	0	0	0	34
Mycorrhizal	7	KX497194	Sebacinaceae	97.627	OK165476	Otu138	47	190	0	0	0	0	0	0	0	0	0	0	0	0	0	0	1	2	0	0	0	0	0	0	1	2	0	0	0	0	0	0	0	1	0	0	0	0	0	0	0	0
Mycorrhizal	38	JX998771	Ceratobasidiaceae	95.882	OK165477	Otu35	1	0	239	6	800	3	18	6	165	3	25	809	382	21	2	186	139	68	13	184	19	11	0	407	34	0	1	26	24	8	55	14	4	5	33	22	34	12	1	4	87	0
Mycorrhizal	9	JF912490	Ceratobasidiaceae	97.712	OK165478	Otu69	0	0	0	0	0	0	0	0	0	0	0	518	1	1	1	1	1	0	0	0	0	1	0	0	0	0	0	0	0	0	0	0	0	0	0	2	0	36	0	0	0	0
Mycorrhizal	14	KP715592	Ceratobasidiaceae	96.486	OK165479	Otu78	0	240	0	0	0	0	6	0	0	1	0	0	0	0	0	0	2	3	0	0	0	0	0	0	0	1	0	4	2	1	2	4	150	346	0	0	0	0	0	0	2	0
Mycorrhizal	8	KF617737	Ceratobasidiaceae	91.331	OK165480	Otu149	0	0	0	1	0	0	0	0	0	0	0	0	0	0	0	0	0	0	0	1	0	0	0	0	0	0	1	115	0	1	29	6	0	0	16	0	0	0	0	0	0	0
Mycorrhizal	12	HQ248215	Ceratobasidiaceae	97.531	OK165481	Otu249	0	0	0	0	0	2	0	12	41	1	1	0	1	0	0	0	0	56	0	0	0	0	0	0	1	0	1	4	0	0	0	0	0	0	14	0	0	24	0	0	0	0
Mycorrhizal	42	AM697896	Tulasnellaceae	100	OK165482	Otu8	8693	7889	735	3	76	262	442	6	98	101	86	2	54	26	9	4	68	39	76	140	192	6138	186	75	4896	2301	56	25	12724	67	2858	34	249	109	2183	13	70	18	39	19	82	58
Mycorrhizal	20	MF071200	Tulasnellaceae	97.179	OK165483	Otu21	0	0	0	14	0	0	0	0	0	0	0	24	0	0	0	0	2	0	2	27	1	3	2	3	338	0	11	4120	5	7	6	65	4	5	0	14	0	0	0	0	2	0
Mycorrhizal	32	GQ241745	Tulasnellaceae	98.724	OK165484	Otu41	1	0	2659	14	19	17	10	3891	20	3	10	272	0	0	2	24	0	1	26	1	0	1	2	58	0	1	32	7	7	13	518	2405	8	4	17	2	0	0	3	48	0	0
Mycorrhizal	6	UDB0314604	Tulasnellaceae	97.01	OK165485	Otu134	0	0	1	0	0	247	0	0	0	0	0	0	0	3	0	0	0	0	0	0	0	4	0	0	0	0	0	0	0	3	0	0	0	0	0	0	0	2	0	0	0	0
opportunistic	3	HQ269808	Ceratobasidiaceae	96.319	OK165486	Otu114	0	0	0	0	0	0	0	19	0	0	0	0	0	0	0	0	0	0	0	0	0	0	0	167	0	0	0	0	0	0	16	0	0	0	0	0	0	0	0	0	0	0
opportunistic	3	MH014991	Ceratobasidiaceae	96.012	OK165487	Otu288	0	0	0	0	0	0	0	0	0	0	0	0	13	0	0	0	0	0	0	0	0	0	0	0	0	0	0	0	1	0	0	0	0	0	0	0	1	0	0	0	0	0
opportunistic	5	GU083186	Sebacinaceae	79.355	OK165488	Otu154	0	0	0	0	0	1	0	0	0	0	0	0	0	0	0	0	0	0	0	0	0	1	0	0	0	0	0	0	0	0	0	0	0	0	0	0	1	90	0	0	43	0
opportunistic	4	FR852342	Sebacinaceae	97.241	OK165489	Otu227	0	0	1	59	0	0	0	0	0	0	0	1	0	0	0	0	0	0	0	0	0	0	0	0	0	0	0	0	0	0	0	0	0	0	0	2	0	0	0	0	0	0
opportunistic	2	HM241746	Sebacinaceae	90.722	OK165490	Otu257	0	0	0	0	0	0	0	0	0	0	0	0	0	0	2	0	20	0	0	0	0	0	0	0	0	0	0	0	0	0	0	0	0	0	0	0	0	0	0	0	0	0
opportunistic	2	UDB0468187	Sebacinaceae	90.182	OK165491	Otu287	0	0	0	0	0	0	0	0	0	0	0	0	0	0	0	0	0	0	0	0	0	0	0	0	0	0	0	0	0	0	0	0	0	0	0	0	0	0	51	1	0	0
opportunistic	2	EF417823	Sebacinaceae	96.167	OK165492	Otu310	0	0	0	0	0	0	0	0	0	0	0	0	0	0	0	0	0	0	0	0	0	0	0	0	0	0	0	0	0	0	0	10	0	0	0	0	0	0	0	1	0	0
opportunistic OTUs were excluded in community analyses

## Sheet: non-rhizoctonia
non-rhizoctonia fungal OTUs detected from P. bulbocodioides
Classification	plant individual number	blasthit	lineage	Identity	#OTU ID	pb1	pb2	pb3	pb4	pb5	pb6	pb13	pb14	pb15	pb16	pb17	pb18	pb25	pb26	pb27	pb28	pb29	pb30	pb37	pb38	pb39	pb40	pb41	pb42	pb49	pb50	pb51	pb52	pb53	pb54	pb61	pb62	pb63	pb64	pb65	pb66	pb73	pb74	pb75	pb76	pb77	pb78
endophytic	8	KC965557	Ascomycota	97.521	Otu140	0	0	0	0	0	0	0	0	0	0	0	0	0	2	0	0	0	0	0	0	0	0	0	0	0	0	0	0	0	81	1	1	0	0	79	1	1	0	1	0	0	0
endophytic	20	EU516718	Ascomycota	90.4	Otu15	0	0	0	6	0	0	0	1	0	0	0	14	0	0	0	2	1	0	5	4281	7	4	5	220	6	6	0	4	0	0	0	1	0	0	2	5	0	0	0	232	4	26
endophytic	6	LC203328	Ascomycota	84.274	Otu158	0	0	0	0	0	0	0	0	0	0	0	0	0	0	0	0	0	0	0	0	0	0	0	0	0	0	0	0	0	0	0	0	0	0	2	0	1	1	0	1	1	127
endophytic	23	HG935201	Ascomycota	97.5	Otu162	0	0	357	1	0	1	1	4	1	1	0	1	1	0	1	30	0	51	1	0	0	0	1	225	2	0	2	13	0	0	32	0	0	0	8	0	0	16	114	0	0	5
endophytic	27	KX438339	Ascomycota	100	Otu25	0	0	0	3	1	0	1	3	0	0	0	19	1	0	43	2	0	0	0	12	3	0	0	1	0	0	4	1615	10	4	135	210	19	4	10	24	118	1	284	2	1	1
endophytic	31	UDB0517414	Ascomycota	96.234	Otu26	0	1	0	0	1	3	0	0	0	0	3	4	783	26	4	3	74	73	61	1	2	21	4	2	0	1	0	0	0	96	4	2	33	26	3	11	12	1277	431	299	4	756
endophytic	20	HG937113	Ascomycota	97.071	Otu319	0	8	1	0	0	1	0	0	0	13	58	0	2	1	1	0	31	2	1	0	0	1	0	0	0	0	52	0	2	0	0	0	0	0	1	1	1	72	96	0	0	2
endophytic	40	HG936889	Ascomycota	100	Otu44	2	471	341	2	2	2	8	1	5	1	4	1	15	37	64	48	23	35	45	134	0	1	0	1	50	9	3	99	52	16	1	1	2	2	10	7	7	276	30	141	647	295
endophytic	7	KF428610	Ascomycota	97.189	Otu99	0	0	0	0	0	0	0	0	0	0	2	1	2	71	0	0	0	0	0	0	0	0	0	0	0	0	0	0	1	0	0	0	0	0	0	0	84	0	0	1	0	0
endophytic	42	LT592901	Ascomycota Dothideomycetes Pleosporales Didymellaceae Didymella keratinophila	98.785	Otu10	8	235	83	13	4	1659	11	587	55	6	26	55	1265	55	164	744	1266	2122	72	3601	17	16	18	845	567	35	9	1471	21	227	411	141	50	24	83	63	1062	398	3318	66	36	3499
endophytic	10	LC169791	Ascomycota Dothideomycetes	95.142	Otu66	0	0	0	0	0	0	0	0	0	0	0	0	0	0	0	72	0	25	11	104	0	0	0	158	0	5	0	0	0	0	0	0	13	0	0	17	30	2	0	0	0	0
endophytic	11	KM216350	Ascomycota Dothideomycetes Botryosphaeriales	90.336	Otu29	0	0	9	7	4	4177	1	5	5	0	0	0	0	24	0	0	0	0	0	0	0	13	0	0	0	0	0	0	0	18	0	0	0	0	0	0	0	22	0	0	0	0
endophytic	7	KT328705	Ascomycota Dothideomycetes Capnodiales	89.583	Otu173	0	118	0	0	0	0	0	0	0	1	0	0	0	0	1	42	1	2	0	0	0	0	0	0	0	0	0	0	0	0	0	0	0	1	0	0	0	0	0	0	0	0
endophytic	41	GU721438	Ascomycota Dothideomycetes Capnodiales Cladosporiaceae Cladosporium cladosporioides	100	Otu22	2	1566	5	1918	13	4338	5	16	56	57	2	142	3	60	467	43	7	48	8	22	0	52	1	4	2	41	1	25	1	23	109	12	2	7	13	29	2	27	2	2	2	65
endophytic	17	KT693730	Ascomycota Dothideomycetes Dothideales Aureobasidiaceae Aureobasidium namibiae	99.194	Otu43	11	2499	0	0	1	1	0	0	1	5	1	0	0	1	0	0	0	14	1	0	1	0	0	0	0	15	0	0	0	0	0	0	0	9	0	0	0	1	1	0	1	32
endophytic	8	UDB0360998	Ascomycota Dothideomycetes Pleosporales	98.198	Otu139	0	0	0	0	0	0	0	0	0	0	0	0	0	0	0	0	0	0	70	1	0	1	1	1	1	1	0	0	12	0	0	0	0	0	0	0	0	0	0	0	0	0
endophytic	34	KT269858	Ascomycota Dothideomycetes Pleosporales	99.598	Otu28	0	235	0	0	0	3	5	0	1	0	5	3	1	26	6	3	1	29	0	3	0	2	7	2	19	2	16	73	16	4	295	315	1	3	1	59	5	468	1105	8	273	118
endophytic	31	JQ846043	Ascomycota Dothideomycetes Pleosporales	98.842	Otu31	0	0	1	0	0	3	1	0	0	1	4	1	57	1	0	0	1	1	1291	9	4	8	4	7	53	8	3	107	0	421	2	0	0	1	16	3	1	149	27	4	4	434
endophytic	13	KT268844	Ascomycota Dothideomycetes Pleosporales	98.79	Otu56	0	0	0	0	0	1	0	0	0	0	0	3	0	58	1	1	0	0	0	630	0	0	0	0	1	1	0	1	0	0	0	0	0	0	1	5	0	39	0	36	0	0
endophytic	9	FJ528684	Ascomycota Dothideomycetes Pleosporales	94.492	Otu65	0	0	0	1	0	0	0	0	0	0	0	5	0	0	0	0	0	0	0	2	0	0	0	0	0	0	2	522	2	0	0	1	0	1	0	4	0	0	0	0	0	0
endophytic	8	UDB0600133	Ascomycota Dothideomycetes Pleosporales Cucurbitariaceae Pyrenochaeta	97.619	Otu200	0	0	0	0	0	0	0	0	0	0	0	0	0	30	2	0	0	0	0	37	0	0	1	0	0	8	9	0	0	0	0	0	0	0	0	0	0	4	0	0	4	0
endophytic	33	KT338640	Ascomycota Dothideomycetes Pleosporales Didymellaceae Didymella rosea	97.976	Otu68	0	0	3	1	3	1371	0	3	3	1	7	8	278	19	7	442	302	278	1	43	1	8	1	8	0	93	0	12	24	27	0	1	2	1	0	0	3	7	1	0	3	1
endophytic	30	LT592930	Ascomycota Dothideomycetes Pleosporales Didymellaceae Epicoccum keratinophilum	98.394	Otu36	0	0	3	8	3	3566	4	101	8	4	0	0	4	12	2	0	133	17	2	4	0	17	1	2	0	107	0	0	0	12	0	1	0	2	1	3	69	28	106	4	1	135
endophytic	13	MK387923	Ascomycota Dothideomycetes Pleosporales Leptosphaeriaceae Plenodomus	100	Otu30	0	3	0	0	0	0	0	0	0	3	0	0	0	0	0	0	0	10	0	0	0	0	0	0	0	7	0	0	0	0	0	0	0	2	15	18	17	16	24	28	10	3059
endophytic	9	MG098781	Ascomycota Dothideomycetes Pleosporales Massarinaceae Helminthosporium	97.166	Otu118	0	0	0	0	24	0	0	0	0	0	0	0	0	0	0	0	2	0	0	0	0	0	0	1	62	1	0	0	1	3	0	0	1	0	19	0	0	0	0	0	0	0
endophytic	6	KP170619	Ascomycota Dothideomycetes Pleosporales Morosphaeriaceae Acrocalymma fici	95.547	Otu214	0	0	0	0	0	0	0	0	0	0	0	1	0	0	0	0	0	0	9	16	0	0	0	0	0	0	0	0	2	1	0	6	0	0	0	0	0	0	0	0	0	0
endophytic	24	KJ702587	Ascomycota Dothideomycetes Pleosporales Phaeosphaeriaceae Paraphoma	100	Otu42	0	1	0	0	0	0	0	0	0	0	1	0	4	3	895	40	3	11	1	0	108	0	0	1	0	3	0	0	5	1	3	0	0	7	4	5	80	79	9	13	6	1042
endophytic	7	KY768869	Ascomycota Dothideomycetes Pleosporales Phaeosphaeriaceae Phaeosphaeria lunariae	94.167	Otu145	0	0	0	0	0	0	0	0	0	0	2	0	0	0	0	0	0	0	73	1	0	3	0	0	1	2	0	0	0	0	0	0	0	0	0	0	0	0	0	25	0	0
endophytic	11	KF746110	Ascomycota Dothideomycetes Pleosporales Thyridariaceae Roussoella mexicana	95.582	Otu61	0	0	0	0	0	0	0	0	0	0	0	4	0	0	0	0	0	0	0	3	0	0	0	0	0	0	1	556	1	2	1	2	1	1	0	2	0	0	0	0	0	0
endophytic	7	KU500569	Ascomycota Dothideomycetes Pleosporales Torulaceae Neotorula	91.928	Otu102	0	0	0	0	0	0	0	0	0	0	0	0	0	0	0	0	0	0	0	0	1	0	0	0	0	0	0	0	1	0	0	0	0	0	1	0	135	0	1	0	1	40
endophytic	10	KX789214	Ascomycota Dothideomycetes Pleosporales Torulaceae Neotorula submersa	90.98	Otu105	0	1	0	0	0	0	0	0	0	1	0	0	0	0	0	0	0	0	0	0	0	0	0	0	0	0	0	0	0	0	0	0	0	0	2	1	2	1	2	6	5	349
endophytic	8	MF990800	Ascomycota Dothideomycetes Tubeufiales Wiesneriomycetaceae Spissiomyces	95.652	Otu86	0	0	0	0	1	498	1	0	1	0	0	0	0	4	0	0	0	0	0	0	0	1	0	0	0	0	0	0	0	4	0	0	0	0	0	0	0	2	0	0	0	0
endophytic	38	JQ846061	Ascomycota Eurotiomycetes Chaetothyriales	97.544	Otu19	0	0	0	1	2	4	2	1	2	0	3	2	184	56	296	202	21	1	217	140	7	54	7	221	1	44	37	182	6	29	112	1	35	6	28	7	102	1015	1925	172	324	462
endophytic	7	JF922047	Ascomycota Eurotiomycetes Eurotiales Aspergillaceae Monascus lunisporas	89.568	Otu155	0	0	0	135	0	0	0	1	1	0	0	2	0	0	0	0	0	0	0	2	0	0	0	0	0	0	0	3	0	0	0	0	0	0	0	5	0	0	0	0	0	0
endophytic	6	KY115690	Ascomycota Eurotiomycetes Eurotiales Thermoascaceae Thermoascus crustaceus	100	Otu231	0	0	0	0	0	0	1	1	0	0	0	0	0	0	0	0	0	0	0	0	0	0	0	0	0	0	0	0	0	0	0	0	1	0	0	0	0	0	0	1	13	29
endophytic	9	KP990996	Ascomycota Eurotiomycetes Phaeomoniellales	88.281	Otu163	0	0	0	0	0	0	0	0	0	0	0	0	0	0	0	1	0	0	0	0	0	0	0	0	0	0	0	0	0	0	22	28	0	0	6	1	0	0	1	1	2	62
endophytic	18	KC965262	Ascomycota Leotiomycetes Helotiales	94.515	Otu131	0	0	41	0	0	0	0	0	0	0	1	0	0	0	1	0	0	2	0	0	0	0	2	0	0	1	0	1	1	11	0	1	0	0	2	2	2	2	311	4	4	207
endophytic	13	UDB0410528	Ascomycota Leotiomycetes Helotiales	100	Otu96	0	0	0	0	0	0	0	1	0	0	1	0	0	19	6	1	0	0	1	0	0	0	0	0	8	0	0	0	0	0	0	62	0	0	101	1	0	1	0	2	1	0
endophytic	8	KU325439	Ascomycota Leotiomycetes Helotiales Dermateaceae Neofabraea vagabunda	98.319	Otu90	0	0	0	0	0	0	0	0	0	0	0	2	0	181	0	2	1	1	0	0	0	1	0	0	0	0	0	0	0	3	0	0	0	0	0	0	0	1	0	0	0	0
endophytic	15	KR859201	Ascomycota Leotiomycetes Helotiales Dermateaceae Pezicula fagacearum	98.745	Otu82	0	1	0	0	0	0	0	0	0	0	0	0	0	0	1	0	0	1	0	0	0	0	0	2	10	1	0	0	0	0	76	87	0	0	35	0	2	1	36	1	6	292
endophytic	14	KC180670	Ascomycota Leotiomycetes Helotiales Helotiaceae Tetracladium	96.639	Otu64	0	0	2	0	0	0	0	0	0	0	1	0	0	1	0	0	0	0	1	0	0	0	0	0	0	0	1	1	0	0	99	0	0	0	393	2	43	3	0	3	1	4
endophytic	42	DQ249992	Ascomycota Leotiomycetes Helotiales Helotiales Rhexocercosporidium panacis	98.326	Otu13	1054	4	3	10	4	5	15	46	95	9	100	174	137	465	1787	217	2968	7466	6	22	111	920	54	24	513	228	32	2886	42	1722	5579	985	213	522	972	20	575	231	40	3010	189	41
endophytic	23	KT269674	Ascomycota Leotiomycetes Helotiales Hyaloscyphaceae	96.17	Otu75	0	0	1	0	0	0	0	1	0	0	0	1	2	0	2	3	225	2	2	0	0	1	1	164	0	0	5	0	0	0	0	1	2	1	8	1	1	0	96	44	106	72
endophytic	8	KT269753	Ascomycota Leotiomycetes Helotiales Hyaloscyphaceae Cistella	91.949	Otu115	0	0	0	0	0	0	0	0	0	0	0	0	0	0	0	0	0	0	0	0	0	0	0	0	0	1	0	0	0	0	0	0	0	0	1	1	1	1	0	3	2	240
endophytic	10	MG001389	Ascomycota Leotiomycetes Thelebolales Pseudeurotiaceae Pseudogymnoascus	97.908	Otu57	1954	1	0	0	0	1	0	0	17	0	0	0	0	0	0	0	32	0	0	0	0	0	0	0	8	0	0	0	0	0	0	0	14	1	0	0	0	0	0	0	19	1
endophytic	9	KY173400	Ascomycota Orbiliomycetes Orbiliales Orbiliaceae Dactylaria acaciae	86.477	Otu121	0	0	0	0	0	0	0	0	0	0	0	0	0	0	0	0	0	2	0	0	0	0	0	0	0	1	0	0	0	0	0	0	0	0	1	3	0	2	2	4	3	282
endophytic	9	KR779472	Ascomycota Saccharomycetes Saccharomycetales Debaryomycetaceae Meyerozyma	98.944	Otu225	1	0	76	1	1	1	0	0	1	0	0	0	0	0	0	0	0	0	1	0	0	0	0	0	0	0	1	0	0	0	0	0	0	0	1	0	0	0	0	0	0	0
endophytic	6	JN943262	Ascomycota Saccharomycetes Saccharomycetales Debaryomycetaceae Scheffersomyces lignosus	95.349	Otu192	0	0	0	0	0	0	0	0	0	0	0	0	0	0	1	0	0	0	0	0	0	0	2	0	0	0	0	0	0	0	0	0	0	0	0	0	2	0	286	1	0	7
endophytic	6	KJ707144	Ascomycota Saccharomycetes Saccharomycetales Saccharomycetaceae Saccharomyces cerevisiae	97.222	Otu331	1	5	0	0	0	0	0	0	0	4	17	0	0	0	0	0	0	0	0	0	0	0	0	0	0	0	0	0	0	0	0	0	1	0	0	0	0	0	0	0	0	1
endophytic	13	EF568042	Ascomycota Saccharomycetes Saccharomycetales Saccharomycetales Candidatropicalis	99.142	Otu52	0	0	1	1	1	1636	1	1	2	0	0	0	0	12	32	0	0	1	0	0	0	17	0	0	0	0	0	0	0	9	0	0	0	0	0	0	0	17	0	0	0	0
endophytic	16	KJ707030	Ascomycota Saccharomycetes Saccharomycetales Saccharomycetales Diutina catenulata	98.276	Otu81	0	0	0	0	0	0	10	0	0	0	1	0	0	1	122	1	0	0	0	0	0	0	5	0	0	0	0	1	0	0	131	0	1	0	1	0	2	2	468	5	1	2
endophytic	18	KY307852	Ascomycota Saccharomycetes Saccharomycetales Saccharomycopsidaceae Saccharomycopsis fibuligera	99.245	Otu95	7	215	0	0	0	1	0	4	0	1	4	1	0	0	0	0	1	0	0	188	0	0	2	0	0	1	0	0	0	1	0	49	0	1	1	1	0	0	54	0	0	1
endophytic	10	MK937679	Ascomycota Sordariomycetes	96.774	Otu135	0	0	1	333	1	1	0	0	1	0	0	7	0	0	0	0	0	0	0	3	0	0	0	0	0	0	0	3	0	0	0	0	0	0	0	5	0	0	0	0	11	0
endophytic	24	LT547782	Ascomycota Sordariomycetes	97.744	Otu51	0	0	0	0	1	0	0	0	0	1	19	38	197	45	463	29	9	1640	0	0	0	0	0	0	18	25	1	35	3	72	45	1	0	8	0	0	0	78	2	13	3	3
endophytic	9	EU139858	Ascomycota Sordariomycetes	94.841	Otu83	0	0	1	521	0	0	1	1	1	0	0	7	0	0	0	0	0	0	0	3	0	0	0	0	0	0	0	5	0	0	0	0	0	0	0	4	0	0	0	0	0	0
endophytic	8	MF380513	Ascomycota Sordariomycetes Diaporthales Valsaceae Phomopsis	96.429	Otu144	0	0	0	0	0	0	0	0	0	0	2	1	1	2	0	1	0	106	0	0	0	0	0	0	0	0	0	0	0	0	0	0	0	0	5	0	0	0	0	0	0	1
endophytic	13	KM105204	Ascomycota Sordariomycetes Glomerellales Glomerellaceae Colletotrichum tabaci	97.2	Otu47	0	0	0	0	0	0	0	0	0	0	0	0	0	0	1	0	0	10	0	3	0	0	0	0	0	0	0	0	0	0	2	0	0	3	8	12	87	40	71	16	12	1629
endophytic	26	MG386080	Ascomycota Sordariomycetes Glomerellales Plectosphaerellaceae Plectosphaerella niemeijerarum	99.618	Otu62	0	0	0	0	0	0	0	0	0	0	1	2	5	296	1	1	137	5	13	0	0	0	1	1	1	11	0	38	0	1	0	144	1	2	2	5	4	4	35	7	1	556
endophytic	26	MF494607	Ascomycota Sordariomycetes Hypocreales	100	Otu20	819	2	0	0	0	1	0	0	6	2	1	1	21	0	0	179	14	6	0	0	0	0	1	1	10	6	0	0	0	0	0	1	2	3	22	29	29	29	29	58	20	4182
endophytic	11	JX042913	Ascomycota Sordariomycetes Hypocreales	96.525	Otu71	0	0	0	0	0	0	0	1	0	0	0	0	0	0	0	3	0	0	0	0	0	0	0	1	0	4	2	0	0	1	1	404	2	0	0	0	0	0	13	0	0	1
endophytic	8	AJ292402	Ascomycota Sordariomycetes Hypocreales Clavicipitaceae Metapochonia suchlasporia	93.548	Otu213	0	0	77	0	0	0	0	1	0	0	2	0	0	0	0	0	0	0	1	0	0	0	0	0	0	0	1	0	0	0	0	0	0	0	1	1	6	0	0	0	0	0
endophytic	8	AY378154	Ascomycota Sordariomycetes Hypocreales Hypocreales Acremonium furcatum	99.558	Otu106	0	0	0	0	0	0	0	0	0	0	0	0	0	0	0	3	0	0	0	0	0	0	0	3	0	0	2	2	0	1	0	157	2	0	0	0	0	0	0	1	0	0
endophytic	19	HQ130669	Ascomycota Sordariomycetes Hypocreales Nectriaceae	97.647	Otu17	0	0	0	0	4	0	0	0	0	0	11	14	2927	5	13	5	12	133	0	701	4	0	1	1	2	5	0	1	4	0	0	0	0	0	0	2	9	0	0	0	0	0
endophytic	23	MH864398	Ascomycota Sordariomycetes Hypocreales Nectriaceae	100	Otu34	1	0	0	0	0	0	0	0	2	0	1	4	3	3	6	2	692	0	0	1	0	0	0	0	2	0	1	0	0	0	2	0	5	2	2	5	8	7	400	5	898	6
endophytic	30	KT269442	Ascomycota Sordariomycetes Hypocreales Nectriaceae	100	Otu39	137	1101	0	1	0	0	0	0	2	1	2	7	8	2	6	28	559	42	0	1	0	0	1	121	1	7	2	80	2	0	1	0	3	7	0	0	1	3	242	2	18	27
endophytic	26	UDB0103446	Ascomycota Sordariomycetes Hypocreales Nectriaceae	99.065	Otu77	312	1	14	0	0	0	0	0	2	0	2	1	3	18	1	118	7	86	2	140	1	2	0	0	5	3	1	1	0	0	0	0	6	1	0	1	0	0	0	4	2	101
endophytic	7	MF120477	Ascomycota Sordariomycetes Hypocreales Nectriaceae Fusarium algeriense	95.331	Otu263	0	0	0	0	0	0	0	0	0	0	0	3	0	0	0	0	0	19	1	425	0	2	0	4	0	1	0	0	0	0	0	0	0	0	0	0	0	0	0	0	0	0
endophytic	20	FJ224100	Ascomycota Sordariomycetes Hypocreales Nectriaceae Ilyonectria liriodendri	98.431	Otu74	288	0	0	0	0	0	0	0	3	0	1	4	1	18	2	2	8	89	0	0	0	0	0	1	3	1	1	153	0	0	1	5	2	0	0	1	0	0	0	0	13	0
endophytic	28	HM008927	Ascomycota Sordariomycetes Hypocreales Nectriaceae Volutella consors	95.473	Otu109	1	0	37	1	0	0	3	3	48	6	16	155	96	13	1	0	2	2	1	0	1	16	0	57	1	1	7	7	0	0	0	0	2	1	0	4	3	1	0	0	1	0
endophytic	31	JX155912	Ascomycota Sordariomycetes Hypocreales Nectriaceae Volutella Volutella thailandensis	93.846	Otu33	85	0	112	2	1	1	0	1	0	0	16	25	28	19	178	48	56	1376	2	181	2	1	2	3	81	25	2	41	0	7	0	0	3	6	3	0	0	0	72	0	1	2
endophytic	6	KX022396	Ascomycota Sordariomycetes Hypocreales Stachybotryaceae Stachybotrys	90.708	Otu157	0	0	0	0	0	0	0	0	0	0	0	0	0	0	0	0	0	1	0	0	0	0	0	0	0	0	0	0	0	0	0	0	0	0	0	1	3	1	0	3	0	90
endophytic	16	MN014058	Ascomycota Sordariomycetes Myrmecridiales Myrmecridiaceae Neomyrmecridium	87.137	Otu59	1	0	0	0	0	1	0	0	1	0	1	0	0	2	0	0	1	1	0	0	0	0	0	0	2	0	0	0	0	0	0	0	2	0	2	7	2	313	34	3	412	0
endophytic	35	AB625592	Ascomycota Sordariomycetes Sordariales Chaetomiaceae Humicola nigrescens	99.592	Otu48	47	1015	57	1	9	1	83	1	3	2	46	22	316	14	38	29	490	675	3	3	21	1	0	214	3	19	0	26	3	0	0	0	125	5	7	0	2	0	3	1	2	4
endophytic	6	DQ219433	Ascomycota Sordariomycetes Trichosphaeriales Trichosphaeriaceae Nigrospora oryzae	97.581	Otu112	0	0	0	0	0	0	0	0	0	0	0	0	0	0	0	0	0	1	17	1	0	0	1	149	0	1	0	0	0	0	0	0	0	0	0	0	0	0	0	0	0	0
endophytic	6	JN207250	Ascomycota Sordariomycetes Trichosphaeriales Trichosphaeriaceae Nigrospora oryzae	95.492	Otu182	0	0	0	0	0	0	0	0	0	0	0	0	0	0	0	0	0	0	0	0	0	0	0	0	0	4	0	0	0	0	0	0	1	0	0	1	1	0	0	1	60	0
endophytic	7	KM199357	Ascomycota Sordariomycetes Xylariales Sporocadaceae Neopestalotiopsis javaensis	98.814	Otu153	0	0	0	126	0	0	0	1	0	0	0	1	0	0	0	0	0	0	0	1	0	0	0	0	0	5	0	1	0	0	0	0	0	0	0	1	0	0	0	0	0	0
endophytic	20	FN689805	Ascomycota Sordariomycetes Xylariales Xylariaceae Xylaria arbuscula	100	Otu63	71	0	1	1	0	350	0	1	1	0	0	4	0	4	0	33	2	0	0	1	0	0	0	0	1	0	0	308	7	5	0	1	1	1	0	3	0	3	0	0	0	0
endophytic	7	GU300091	Ascomycota Sordariomycetes Xylariales Xylariaceae Xylaria venustula	89.474	Otu111	0	0	0	0	1	376	0	0	2	0	0	0	0	3	0	0	0	0	0	0	0	3	0	0	0	0	0	0	0	2	0	0	0	0	0	0	0	1	0	0	0	0
endophytic	11	UDB067496	Ascomycota Sordariomycetes Xylariales Xylariales Fusidium	96.186	Otu132	0	0	0	1	0	0	0	0	0	0	0	1	0	0	1	0	0	0	0	0	0	1	2	0	29	1	0	28	0	1	107	0	0	0	20	0	0	0	0	0	0	0
endophytic	13	HQ604766	Basidiomycota Agaricomycetes Agaricales	96.785	Otu40	0	0	0	0	0	0	0	9	0	0	10	6	4	8	7	2598	3	4	0	0	0	0	0	4	0	0	0	0	1	0	0	5	0	0	0	0	0	0	0	8	0	0
endophytic	6	EU622256	Basidiomycota Agaricomycetes Agaricales	99.267	Otu88	0	0	0	0	3	0	0	0	0	0	0	0	243	0	0	1	0	0	0	0	1	0	0	0	0	0	0	0	1	0	0	0	0	0	0	0	1	0	0	0	0	0
endophytic	19	EF374132	Basidiomycota Agaricomycetes Agaricales Tricholomataceae Calyptella capula	96.194	Otu60	0	0	0	0	0	5	0	0	0	0	0	0	0	3	5	0	0	0	4	1	2	12	689	2	0	6	4	3	1	724	2	2	2	0	0	0	0	3	3	0	0	0
endophytic	21	KF297008	Basidiomycota Agaricomycetes Agaricales Tricholomataceae Mycena	93.056	Otu12	1	0	42	28	21587	40	25	42	47	11	0	1	194	0	0	1	0	0	2	1	229	0	1	3	0	0	0	0	145	0	0	0	0	0	0	0	228	0	2	0	0	3
endophytic	14	KC965196	Basidiomycota Agaricomycetes Auriculariales	98.252	Otu37	0	0	0	0	0	0	0	7	2	0	0	0	0	0	0	2	0	0	0	0	0	0	1	4	0	0	3	3	4	4	134	1325	3	1	0	0	0	0	0	1	0	0
endophytic	19	GQ924016	Basidiomycota Agaricomycetes Auriculariales	93.031	Otu58	0	0	0	0	0	0	1	0	0	0	0	0	1	0	3	0	0	0	0	0	112	0	1	0	0	0	0	163	0	1	184	2	1	1	5	4	12	7	871	125	828	1
endophytic	9	JX135063	Basidiomycota Agaricomycetes Auriculariales Exidiaceae	96.127	Otu125	0	0	1	260	1	0	1	0	2	0	0	1	0	0	0	0	0	0	0	1	0	0	0	0	0	0	0	2	0	0	0	0	0	0	0	3	0	0	0	0	0	0
endophytic	9	AF145586	Basidiomycota Agaricomycetes Hymenochaetales Schizoporaceae Schizopora ovispora	98.054	Otu126	0	0	1	1	245	0	0	0	1	0	0	0	1	0	1	0	0	0	0	0	1	0	0	0	0	0	0	0	1	0	0	0	0	0	0	0	1	0	0	0	0	0
endophytic	9	UDB016324	Basidiomycota Agaricomycetes Hymenochaetales Schizoporaceae Xylodon sambuci	87.586	Otu119	0	0	0	312	0	2	1	1	0	0	0	5	0	0	0	0	0	0	0	1	0	0	0	0	0	1	0	3	0	0	0	0	0	0	0	3	0	0	0	0	0	0
endophytic	8	UDB0183662	Basidiomycota Agaricomycetes Polyporales	97.376	Otu191	0	0	0	0	182	0	0	1	2	1	0	0	1	0	0	0	0	0	0	0	1	0	0	0	0	0	0	0	2	0	0	0	0	0	0	0	3	0	0	0	0	0
endophytic	11	KM278016	Basidiomycota Agaricomycetes Polyporales Cerrenaceae Pseudolagarobasidium belizense	92.857	Otu67	0	0	0	1	0	1056	2	1	1	1	0	0	0	2	0	0	0	0	0	1	0	6	0	0	0	0	0	0	0	7	0	0	0	0	0	0	0	7	0	0	0	0
endophytic	17	UDB095128	Basidiomycota Agaricomycetes Trechisporales	96.139	Otu100	0	0	0	0	158	0	3	1	0	0	0	0	76	0	0	1	1	0	0	0	1	1	0	78	17	1	4	5	2	0	0	1	0	0	0	0	12	18	0	0	0	0
endophytic	8	UDB055493	Basidiomycota Agaricomycetes Trechisporales	83.333	Otu260	1	0	0	0	0	0	0	9	1	1	0	0	0	0	0	0	0	21	0	0	0	0	0	0	0	0	0	0	0	0	0	0	0	0	0	0	0	0	0	2	36	1
endophytic	12	KU163843	Basidiomycota Malasseziomycetes Malasseziales Malasseziaceae Malassezia	92.916	Otu141	0	0	0	73	0	0	0	0	0	0	0	0	0	0	137	0	1	0	0	0	0	0	1	0	0	0	0	2	0	1	2	5	0	0	1	0	0	0	109	1	52	0
endophytic	9	KM235691	Basidiomycota Malasseziomycetes Malasseziales Malasseziaceae Malassezia arunalokei	91.957	Otu108	0	0	0	0	1	0	0	300	0	0	0	0	0	0	0	4	0	0	0	0	5	0	0	6	0	0	0	0	0	0	0	3	0	0	0	1	0	0	48	4	0	0
endophytic	16	GU291271	Basidiomycota Malasseziomycetes Malasseziales Malasseziaceae Malassezia globosa	99.676	Otu124	0	0	0	0	0	0	0	4	0	0	21	0	77	42	1	30	37	0	0	0	0	7	0	0	0	1	0	0	0	1	0	0	0	0	11	3	1	10	0	37	6	0
endophytic	7	KJ832031	Basidiomycota Pucciniomycetes Septobasidiales Septobasidiaceae Septobasidium	80.328	Otu123	0	0	1	0	0	0	0	0	1	0	1	0	1	0	0	0	246	1	0	0	0	0	0	0	0	0	0	0	0	0	0	0	0	0	0	0	0	0	0	0	1	0
endophytic	13	UDB0768226	Mortierellomycota Mortierellomycetes Mortierellales Mortierellaceae Mortierella	95.015	Otu107	0	0	331	1	1	1	1	2	0	0	1	0	0	0	0	0	1	0	7	2	0	0	0	1	69	0	1	0	0	0	0	0	0	0	0	0	0	0	0	0	0	0
endophytic	12	UDB0755512	Mortierellomycota Mortierellomycetes Mortierellales Mortierellaceae Mortierella zonata	96	Otu101	33	0	1056	3	5	2	1	1	1	0	6	0	0	0	0	0	0	0	3	0	0	0	0	0	0	0	4	0	0	0	0	0	0	0	3	0	0	0	0	0	0	0
opportunistic	5	MH856173	Ascomycota Dothideomycetes Pleosporales Coniothyriaceae Aristastoma oeconomicum	80.769	Otu193	0	0	0	0	0	0	0	0	0	0	0	0	1	0	0	7	0	0	0	0	0	0	0	0	0	0	0	0	0	3	0	0	0	0	0	0	0	0	64	2	0	0
opportunistic	5	KP004452	Ascomycota Dothideomycetes Pleosporales Phaeosphaeriaceae Phaeosphaeria podocarpi	94	Otu256	0	0	0	0	0	0	0	0	0	1	0	1	0	1	0	1	0	25	0	0	0	0	0	0	0	0	0	0	0	0	0	0	0	0	0	0	0	0	0	0	0	0
opportunistic	5	HQ184175	Ascomycota Dothideomycetes Pleosporales Phaeosphaeriaceae Phaeosphaeriopsis	96.296	Otu201	0	0	0	0	0	0	0	0	0	0	0	0	0	0	1	0	0	0	0	0	1	0	0	0	0	0	0	0	29	0	0	0	1	0	0	0	1	0	0	0	0	0
opportunistic	5	KU366495	Ascomycota Eurotiomycetes Eurotiales Aspergillaceae Aspergillus flavus	99.614	Otu164	0	0	1	93	0	41	0	2	0	0	0	0	0	0	0	0	0	0	0	0	0	0	0	0	0	0	0	0	0	0	0	0	0	0	0	2	0	0	0	0	0	0
opportunistic	5	GQ411350	Ascomycota Leotiomycetes Helotiales Helotiaceae Tricladium splendens	96.639	Otu252	0	0	0	0	0	0	0	0	0	0	0	0	0	0	0	0	0	1	0	0	0	0	0	0	0	0	0	0	0	0	0	0	1	0	0	0	1	0	0	0	1	34
opportunistic	5	UDB0591141	Ascomycota Leotiomycetes Rhytismatales Rhytismatales Karstenia rhopaloides	92.683	Otu110	0	0	0	0	0	0	0	0	0	0	0	0	0	0	0	107	0	0	0	0	0	0	0	0	0	0	0	0	0	0	0	0	0	0	0	0	0	52	15	2	0	1
opportunistic	5	JX508810	Ascomycota Sordariomycetes Glomerellales Plectosphaerellaceae Plectosphaerella oligotrophica	96.183	Otu235	0	0	0	0	0	0	0	0	0	0	0	0	0	0	0	1	0	0	10	0	0	0	0	0	0	8	0	0	0	0	0	28	0	0	0	0	0	0	0	1	0	0
opportunistic	5	JN187967	Ascomycota Sordariomycetes Glomerellales Plectosphaerellaceae Verticillium klebahnii	97.706	Otu130	0	0	0	0	0	0	0	1	0	0	0	0	0	0	0	1	0	0	0	0	0	0	0	1	0	0	1	0	0	0	0	102	0	0	0	0	0	0	0	0	0	0
opportunistic	5	JQ272439	Ascomycota Sordariomycetes Hypocreales Clavicipitaceae Pochonia	91.958	Otu321	0	0	0	0	0	0	0	0	0	0	0	1	0	0	1	0	13	2	0	0	0	0	0	0	0	1	0	0	0	0	0	0	0	0	0	0	0	0	0	0	0	0
opportunistic	5	KF293332	Ascomycota Sordariomycetes Hypocreales Nectriaceae Fusarium	100	Otu147	0	0	0	142	0	0	0	1	0	0	0	2	0	0	0	0	0	0	0	1	0	0	0	0	0	0	0	0	0	0	0	0	0	0	0	3	0	0	0	0	0	0
opportunistic	5	HQ897804	Ascomycota Sordariomycetes Hypocreales Nectriaceae Fusarium albidum	94.776	Otu248	0	0	0	0	0	0	0	0	0	0	0	0	0	0	0	0	0	0	0	0	0	0	0	1	10	0	0	0	0	0	9	0	0	0	2	0	0	0	0	0	0	15
opportunistic	5	AY320194	Ascomycota Sordariomycetes Hypocreales Nectriaceae Fusarium cuneirostrum	93.411	Otu120	201	0	0	0	0	0	0	0	1	0	0	1	0	0	0	0	51	0	0	0	0	0	0	0	0	0	0	0	0	0	0	0	0	0	0	0	0	0	0	0	1	0
opportunistic	5	KU324991	Ascomycota Sordariomycetes Hypocreales Nectriaceae Gibberella baccata	98.438	Otu104	0	0	0	0	0	0	0	0	0	0	1	1	0	1	0	177	0	0	0	0	0	0	0	0	0	0	0	0	0	0	0	0	0	0	0	0	0	0	0	2	0	0
opportunistic	5	MH865071	Ascomycota	97.166	Otu266	0	0	14	0	0	1	0	0	0	0	0	0	0	2	0	0	0	0	0	0	0	0	0	0	0	0	0	0	0	0	0	0	14	0	1	0	0	0	0	0	0	0
opportunistic	5	FM999575	Basidiomycota Agaricomycetes Trechisporales Hydnodontaceae	83.871	Otu161	0	0	0	0	0	0	0	0	0	0	2	0	0	1	0	1	124	1	0	0	0	0	0	0	0	0	0	0	0	0	0	0	0	0	0	0	0	0	0	0	0	0
opportunistic	5	KU948746	Basidiomycota Cystobasidiomycetes	83.03	Otu234	0	0	0	0	0	0	0	0	0	0	1	1	0	0	2	0	26	0	0	0	0	0	0	0	1	0	0	0	0	0	0	0	0	0	0	0	0	0	0	0	0	0
opportunistic	5	LC131409	Basidiomycota Dacrymycetes Dacrymycetales Dacrymycetaceae Calocera	84.962	Otu202	1	0	0	0	0	0	0	0	0	0	0	0	1	1	0	1	48	0	0	0	0	0	0	0	0	0	0	0	0	0	0	0	0	0	0	0	0	0	0	0	0	0
opportunistic	5	KY104143	Basidiomycota Malasseziomycetes Malasseziales Malasseziaceae Malassezia nana	81.121	Otu222	0	0	0	0	0	0	0	64	0	0	0	0	0	0	0	1	0	0	0	0	0	0	0	1	0	0	0	0	0	0	0	2	0	0	0	0	0	0	0	1	0	0
opportunistic	5	KJ209699	Glomeromycota Glomeromycetes Glomerales Glomeraceae	95.563	Otu183	0	0	0	0	0	0	0	0	0	0	0	0	0	0	1	0	0	0	0	0	0	0	0	0	0	0	0	1	0	0	104	0	1	0	0	0	0	0	1	0	0	0
opportunistic	5	JF439109	Glomeromycota Glomeromycetes Glomerales Glomeraceae Rhizophagus intraradices	96.678	Otu180	0	0	0	0	0	0	0	0	0	0	0	0	0	0	2	0	0	0	0	0	0	0	0	0	0	0	1	0	0	0	244	1	0	0	11	0	0	0	0	0	0	0
opportunistic	4	KF813069	Ascomycota Dothideomycetes Pleosporales Melanommataceae Farlowiella carmichaeliana	93.145	Otu219	0	0	0	0	0	0	0	0	0	0	0	0	0	7	0	0	1	0	0	0	0	0	0	0	0	0	0	1	0	0	0	0	25	0	0	0	0	0	0	0	0	0
opportunistic	4	GU721686	Ascomycota Dothideomycetes Pleosporales Phaeosphaeriaceae Phaeosphaeria caricis	97.2	Otu179	0	0	0	0	0	0	0	0	0	0	0	0	0	0	1	0	0	0	0	0	0	0	0	0	18	0	0	0	0	0	22	12	0	0	0	0	0	0	0	0	0	0
opportunistic	4	JQ846061	Ascomycota Eurotiomycetes Chaetothyriales	94.737	Otu315	27	0	0	0	0	0	0	0	0	0	0	0	0	0	0	0	0	0	0	0	0	0	0	0	0	0	0	0	0	0	0	0	1	0	0	0	0	0	4	0	4	0
opportunistic	4	EF669943	Ascomycota Eurotiomycetes Eurotiales Aspergillaceae Aspergillus spathulatus	89.179	Otu181	113	0	0	0	0	0	0	0	0	0	0	1	0	0	0	0	1	0	0	0	0	0	0	0	1	0	0	0	0	0	0	0	0	0	0	0	0	0	0	0	0	0
opportunistic	4	KF183638	Ascomycota Eurotiomycetes Eurotiales Trichocomaceae Talaromyces angelicus	99.595	Otu169	119	0	0	0	0	0	0	0	0	0	0	0	0	0	0	0	1	0	0	0	0	0	0	0	1	0	0	0	0	0	0	0	0	0	0	0	0	0	0	0	1	0
opportunistic	4	EU490097	Ascomycota Lecanoromycetes	85.878	Otu142	0	0	0	0	0	0	0	0	0	0	0	0	1	0	0	0	0	0	0	0	0	0	0	0	0	0	0	0	75	1	0	0	0	2	0	0	0	0	0	0	0	0
opportunistic	4	HQ623547	Ascomycota Saccharomycetes Saccharomycetales Saccharomycetaceae Saccharomyces	94.958	Otu296	2	0	0	0	0	0	0	0	0	1	21	0	0	0	1	0	0	0	0	0	0	0	0	0	0	0	0	0	0	0	0	0	0	0	0	0	0	0	0	0	0	0
opportunistic	4	KX828198	Ascomycota Sordariomycetes Glomerellales Glomerellaceae Colletotrichum orchidearum	99.598	Otu92	0	0	0	0	0	425	0	0	0	0	0	0	0	4	0	0	0	0	0	0	0	5	0	0	0	0	0	0	0	0	0	0	0	0	0	0	0	1	0	0	0	0
opportunistic	4	DQ448037	Ascomycota Sordariomycetes Hypocreales Hypocreales Ustilaginoidea virens	98.964	Otu212	0	0	0	0	0	0	0	0	0	4	0	0	0	0	34	0	0	0	0	0	0	0	0	0	0	0	0	0	0	0	0	0	0	0	0	0	3	0	33	0	0	0
opportunistic	4	DQ135999	Ascomycota Sordariomycetes Hypocreales Stachybotryaceae	94.862	Otu194	0	0	0	0	0	0	0	0	0	0	0	0	1	15	0	0	0	0	0	0	0	0	0	0	0	0	0	0	0	0	0	0	0	0	0	0	0	13	0	0	0	3
opportunistic	4	KP714281	Ascomycota Sordariomycetes Hypocreales Stachybotryaceae Myrothecium roridum	99.286	Otu160	0	0	0	0	0	0	0	0	0	0	1	0	0	42	0	0	0	0	14	0	0	1	0	0	0	0	0	0	0	0	0	0	0	0	0	0	0	0	0	0	0	0
opportunistic	4	KM199330	Ascomycota Sordariomycetes Xylariales Sporocadaceae Pestalotiopsis scoparia	99.222	Otu143	0	0	0	0	0	0	0	0	0	0	0	0	0	0	0	75	0	0	0	20	2	0	0	1	0	0	0	0	0	0	0	0	0	0	0	0	0	0	0	0	0	0
opportunistic	4	KF128786	Ascomycota Sordariomycetes Xylariales Xylariaceae	91.519	Otu128	0	0	0	0	0	0	0	0	0	0	0	0	1	0	0	107	0	0	0	0	0	0	0	1	0	0	0	0	0	0	0	0	0	0	0	0	0	0	0	1	0	0
opportunistic	4	KM657888	Basidiomycota Agaricomycetes Agaricales Agaricaceae Agaricus Agaricus pusillobulbosus	94.702	Otu216	7	0	0	0	0	0	0	0	0	0	0	0	0	0	0	0	0	26	12	0	0	5	0	0	0	0	0	0	0	0	0	0	0	0	0	0	0	0	0	0	0	0
opportunistic	4	UDB0200592	Basidiomycota Agaricomycetes Agaricales Tricholomataceae Hemimycena mairei	94.355	Otu224	0	0	0	0	0	0	0	1	0	0	0	0	0	0	0	1	0	0	0	0	0	0	0	0	0	0	0	0	0	0	0	0	0	0	1	0	0	0	0	49	0	0
opportunistic	4	KY626311	Basidiomycota Cystobasidiomycetes Cystobasidiales Cystobasidiaceae Cystobasidium alpinum	95.254	Otu277	0	41	0	0	0	0	0	0	0	1	0	0	0	0	0	0	0	1	0	0	0	0	0	0	0	0	0	0	0	0	0	0	0	0	0	0	0	0	0	0	0	1
opportunistic	4	JN882336	Basidiomycota Cystobasidiomycetes Cystobasidiomycetes Microsporomycetaceae Microsporomyces bloemfonteinensis	84.756	Otu232	0	0	0	0	0	0	0	0	0	0	0	0	1	1	0	0	47	0	0	0	0	0	0	0	1	0	0	0	0	0	0	0	0	0	0	0	0	0	0	0	0	0
opportunistic	3	MH304484	Atractiellales Helicogloea burdsallii	82.951	Otu146	0	0	0	0	0	163	0	0	0	0	0	0	0	1	0	0	0	0	0	0	0	0	0	0	0	0	0	0	0	2	0	0	0	0	0	0	0	0	0	0	0	0
opportunistic	3	KM032306	Ascomycota Dothideomycetes	93.676	Otu159	0	129	0	0	0	0	0	0	0	0	0	0	0	0	0	0	0	1	0	0	0	0	0	0	0	0	0	0	0	0	0	0	0	3	0	0	0	0	0	0	0	0
opportunistic	3	JQ622087	Ascomycota Dothideomycetes Capnodiales Dissoconiaceae Ramichloridium cucurbitae	100	Otu336	0	0	0	0	0	0	0	0	14	0	0	0	0	0	0	0	0	0	0	0	0	0	0	0	1	0	0	0	0	0	0	0	0	0	0	0	0	0	0	0	3	0
opportunistic	3	KT270196	Ascomycota Dothideomycetes Pleosporales	95.181	Otu206	0	0	0	0	0	0	0	0	0	0	0	0	0	0	0	0	0	0	0	0	0	0	0	0	0	0	0	0	0	0	0	0	0	0	1	0	0	0	0	2	0	61
opportunistic	3	GU566293	Ascomycota Dothideomycetes Pleosporales Leptosphaeriaceae Plenodomus biglobosus	91.903	Otu187	0	0	0	0	0	0	0	0	0	0	0	0	15	0	0	41	1	0	0	0	0	0	0	0	0	0	0	0	0	0	0	0	0	0	0	0	0	0	0	0	0	0
opportunistic	3	MK511913	Ascomycota Dothideomycetes Pleosporales Phaeosphaeriaceae Setophoma yunnanensis	95.102	Otu308	0	0	0	0	0	0	0	0	0	0	0	0	1	0	0	0	1	22	0	0	0	0	0	0	0	0	0	0	0	0	0	0	0	0	0	0	0	0	0	0	0	0
opportunistic	3	MK116366	Ascomycota Eurotiomycetes Chaetothyriales Cyphellophoraceae Cyphellophora	97.004	Otu290	0	0	0	0	0	0	0	0	0	0	0	0	0	0	0	0	0	0	0	0	0	0	0	0	0	0	0	0	0	1	0	13	0	0	0	0	0	0	0	2	0	0
opportunistic	3	GU174333	Ascomycota Leotiomycetes Helotiales Leotiaceae Alatospora	96.667	Otu286	0	0	0	24	0	0	0	0	1	0	0	0	0	0	0	0	0	0	0	1	0	0	0	0	0	0	0	0	0	0	0	0	0	0	0	0	0	0	0	0	0	0
opportunistic	3	LC168781	Ascomycota Sordariomycetes Diaporthales Valsaceae Phomopsis pustulata	95.276	Otu207	0	0	0	62	0	2	0	0	0	0	0	1	0	0	0	0	0	0	0	0	0	0	0	0	0	0	0	0	0	0	0	0	0	0	0	0	0	0	0	0	0	0
opportunistic	3	HQ880787	Ascomycota Sordariomycetes Hypocreales Cordycipitaceae Beauveria asiatica	96.471	Otu203	0	0	0	0	0	0	0	0	0	0	0	0	0	0	0	0	0	0	0	1	0	28	0	0	0	0	0	0	0	0	0	0	0	0	6	0	0	0	0	0	0	0
opportunistic	3	KM231763	Ascomycota Sordariomycetes Hypocreales Nectriaceae Neonectria tsugae	94.186	Otu298	0	0	0	0	0	0	0	0	0	0	0	0	0	0	0	0	0	0	0	1	0	0	0	0	0	0	0	10	0	0	0	0	1	0	0	0	0	0	0	0	0	0
opportunistic	3	KU747794	Ascomycota Sordariomycetes Microascales	87.361	Otu270	0	0	0	0	0	0	0	0	0	0	0	0	0	0	0	0	0	0	0	0	0	10	0	1	13	0	0	0	0	0	0	0	0	0	0	0	0	0	0	0	0	0
opportunistic	3	MH498519	Ascomycota Sordariomycetes Xylariales Apiosporaceae Arthrinium malaysianum	99.13	Otu281	0	0	0	37	0	0	0	0	0	0	0	1	0	0	0	0	0	0	0	0	0	0	0	0	0	0	0	0	0	0	0	0	0	0	0	1	0	0	0	0	0	0
opportunistic	3	JQ761919	Ascomycota Sordariomycetes Xylariales Xylariaceae Virgaria	94.355	Otu148	0	0	0	0	0	0	0	0	0	0	0	0	1	0	0	0	0	0	0	0	79	0	2	0	0	0	0	0	0	0	0	0	0	0	0	0	0	0	0	0	0	0
opportunistic	3	MF511146	Basidiomycota Agaricomycetes Agaricales Agaricaceae Agaricus candussoi	96.61	Otu261	0	0	0	0	0	0	0	0	0	0	0	0	1	0	21	0	0	18	0	0	0	0	0	0	0	0	0	0	0	0	0	0	0	0	0	0	0	0	0	0	0	0
opportunistic	3	UDB028164	Basidiomycota Agaricomycetes Hymenochaetales Schizoporaceae Xylodon	87.043	Otu184	1	114	0	0	0	0	0	0	0	0	0	0	0	0	0	0	0	0	0	0	0	0	0	0	0	2	0	0	0	0	0	0	0	0	0	0	0	0	0	0	0	0
opportunistic	3	KR015006	Basidiomycota Agaricomycetes Polyporales Phanerochaetaceae	93	Otu326	0	0	0	0	0	0	0	20	0	0	0	0	0	0	0	0	0	0	10	0	0	0	0	0	0	0	0	0	0	0	0	1	0	0	0	0	0	0	0	0	0	0
opportunistic	3	HM622151	Basidiomycota Agaricomycetes Polyporales Polyporaceae Trametes	97.527	Otu285	0	0	0	0	0	0	0	0	0	0	0	0	0	0	0	0	0	0	0	1	0	0	0	0	0	0	0	15	0	0	1	0	0	0	0	0	0	0	0	0	0	0
opportunistic	3	KX347559	Basidiomycota Tremellomycetes Trichosporonales Trichosporonaceae Trichosporon asahii	99.62	Otu133	0	0	0	0	0	0	0	0	0	0	9	0	0	0	0	0	0	0	0	126	0	1	0	0	0	0	0	0	0	0	0	0	0	0	0	0	0	0	0	0	0	0
opportunistic	2	EU046087	Ascomycota Archaeorhizomycetes Archaeorhizomycetales Archaeorhizomycetaceae Archaeorhizomyces borealis	83.824	Otu369	11	1	0	0	0	0	0	0	0	0	0	0	0	0	0	0	0	0	0	0	0	0	0	0	0	0	0	0	0	0	0	0	0	0	0	0	0	0	0	0	0	0
opportunistic	2	JX143583	Ascomycota Dothideomycetes Capnodiales Mycosphaerellaceae Cercospora coniogrammes	98.305	Otu218	0	0	0	0	0	0	0	0	0	0	0	0	0	0	0	0	0	0	0	1	0	17	0	0	0	0	0	0	0	0	0	0	0	0	0	0	0	0	0	0	0	0
opportunistic	2	HQ207062	Ascomycota Dothideomycetes Pleosporales	99.167	Otu171	0	0	0	0	0	0	0	0	0	0	0	0	0	0	0	0	0	0	0	0	0	0	0	0	0	0	0	56	0	0	0	0	0	0	0	1	0	0	0	0	0	0
opportunistic	2	KX515321	Ascomycota Dothideomycetes Pleosporales Phaeosphaeriaceae	83.333	Otu220	0	0	0	0	0	0	0	0	0	0	0	0	0	0	1	32	0	0	0	0	0	0	0	0	0	0	0	0	0	0	0	0	0	0	0	0	0	0	0	0	0	0
opportunistic	2	KX655559	Ascomycota Dothideomycetes Pleosporales Phaeosphaeriaceae Leptospora thailandica	82.591	Otu339	0	0	0	0	0	0	0	0	0	0	0	0	0	0	0	0	0	0	0	0	0	0	0	0	0	0	0	0	0	0	0	0	0	0	0	0	0	0	0	0	1	12
opportunistic	2	AY265337	Ascomycota Dothideomycetes Pleosporales Pleomassariaceae Tumularia aquatica	92.713	Otu365	0	0	0	0	0	0	0	0	0	0	1	0	0	0	0	0	0	0	0	0	0	0	0	0	0	0	0	0	0	0	0	0	0	0	4	0	0	0	0	0	0	0
opportunistic	2	KY541837	Ascomycota Eurotiomycetes Eurotiales Thermoascaceae Thermoascus aurantiacus	100	Otu364	0	0	0	0	0	0	0	0	3	0	4	0	0	0	0	0	0	0	0	0	0	0	0	0	0	0	0	0	0	0	0	0	0	0	0	0	0	0	0	0	0	0
opportunistic	2	KT365214	Ascomycota Eurotiomycetes Eurotiales Trichocomaceae Thermomyces lanuginosus	100	Otu204	0	0	0	0	0	0	0	0	0	0	0	24	0	0	0	0	0	0	0	0	0	0	0	0	6	0	0	0	0	0	0	0	0	0	0	0	0	0	0	0	0	0
opportunistic	2	EU075537	Ascomycota Lecanoromycetes Lecanorales Haematommataceae Haematomma sulphureum	90.361	Otu292	0	0	0	0	0	0	1	0	0	0	0	0	0	0	46	0	0	0	0	0	0	0	0	0	0	0	0	0	0	0	0	0	0	0	0	0	0	0	0	0	0	0
opportunistic	2	MK305901	Ascomycota Leotiomycetes	82.955	Otu362	0	0	0	0	0	0	0	0	0	0	0	0	0	0	0	0	0	0	0	0	0	0	0	0	0	0	0	0	0	0	0	0	7	0	0	0	0	0	0	0	1	0
opportunistic	2	HF947877	Ascomycota Leotiomycetes Helotiales Hyaloscyphaceae	94.515	Otu150	0	0	0	0	0	0	0	0	0	0	0	1	50	0	0	0	0	0	0	0	0	0	0	0	0	0	0	0	0	0	0	0	0	0	0	0	0	0	0	0	0	0
opportunistic	2	KX271723	Ascomycota Pezizomycetes Pezizales Pezizaceae Peziza hellenica	92.339	Otu302	0	0	0	0	0	0	0	0	0	0	0	0	1	0	0	0	0	22	0	0	0	0	0	0	0	0	0	0	0	0	0	0	0	0	0	0	0	0	0	0	0	0
opportunistic	2	MK335914	Ascomycota Pezizomycotina Pseudohelicomyces Pseudohelicomyces menglunicus	92.5	Otu269	0	0	0	0	0	0	0	0	0	0	0	0	0	0	2	0	0	0	0	0	0	0	0	0	0	0	0	0	0	0	0	0	0	0	0	0	0	0	37	0	0	0
opportunistic	2	KU747811	Ascomycota Sordariomycetes	93.2	Otu322	0	0	0	0	0	0	0	0	0	0	0	0	0	0	0	0	0	0	0	0	0	6	0	0	0	0	0	0	0	0	0	0	0	0	16	0	0	0	0	0	0	0
opportunistic	2	KR476750	Ascomycota Sordariomycetes Glomerellales Plectosphaerellaceae Plectosphaerella populi	94.34	Otu195	0	0	0	0	0	0	0	0	0	0	0	0	0	0	0	0	0	0	0	0	0	0	0	0	0	0	0	25	0	0	0	7	0	0	0	0	0	0	0	0	0	0
opportunistic	2	MF787283	Ascomycota Sordariomycetes Hypocreales	92.52	Otu311	0	0	0	0	0	0	0	0	0	0	0	0	0	0	0	0	0	0	0	0	0	0	0	0	0	0	0	0	0	0	0	0	0	0	0	1	0	0	18	0	0	0
opportunistic	2	KX228277	Ascomycota Sordariomycetes Hypocreales Bionectriaceae Paracylindrocarpon aloicola	87.407	Otu209	0	0	0	0	0	0	0	0	0	0	0	0	2	20	0	0	0	0	0	0	0	0	0	0	0	0	0	0	0	0	0	0	0	0	0	0	0	0	0	0	0	0
opportunistic	2	LC092889	Ascomycota Sordariomycetes Hypocreales Cordycipitaceae	97.701	Otu375	0	0	0	14	0	0	0	0	0	0	0	0	0	0	0	0	0	0	0	1	0	0	0	0	0	0	0	0	0	0	0	0	0	0	0	0	0	0	0	0	0	0
opportunistic	2	AF081471	Ascomycota Sordariomycetes Hypocreales Stachybotryaceae Memnoniella longistipitata	93.066	Otu312	0	0	0	0	0	0	0	0	0	0	0	0	0	0	0	0	0	0	0	0	1	0	0	0	0	0	0	0	0	0	0	0	0	0	0	0	7	0	0	0	0	0
opportunistic	2	AJ875341	Ascomycota Sordariomycetes Myrmecridiales Myrmecridiaceae Myrmecridium	98.305	Otu175	0	0	0	0	0	0	0	0	0	0	0	0	42	0	0	0	0	0	0	0	0	0	0	0	0	0	0	0	0	2	0	0	0	0	0	0	0	0	0	0	0	0
opportunistic	2	UDB049309	Ascomycota Sordariomycetes Sordariales	96.585	Otu253	0	0	0	0	0	0	0	0	0	0	0	0	0	0	0	0	0	0	0	0	0	0	0	0	0	0	0	0	0	0	0	0	17	0	0	0	0	0	0	0	1	0
opportunistic	2	KF385360	Ascomycota Sordariomycetes Xylariales	94.737	Otu265	0	0	0	0	0	0	0	0	0	0	0	0	0	0	0	0	0	0	0	0	0	0	2	0	0	0	0	0	0	27	0	0	0	0	0	0	0	0	0	0	0	0
opportunistic	2	KP306931	Ascomycota Sordariomycetes Xylariales	96.047	Otu357	0	0	11	0	0	0	0	0	0	0	1	0	0	0	0	0	0	0	0	0	0	0	0	0	0	0	0	0	0	0	0	0	0	0	0	0	0	0	0	0	0	0
opportunistic	2	KM216784	Ascomycota Sordariomycetes Xylariales	98.431	Otu384	0	0	0	0	0	0	0	0	0	0	0	0	0	0	0	0	0	0	0	0	1	0	0	0	0	0	0	0	0	0	0	0	0	0	0	0	1	0	0	0	0	0
opportunistic	2	MG649311	Ascomycota Sordariomycetes Xylariales Xylariaceae	79.528	Otu129	0	0	0	0	0	0	0	0	0	0	0	0	0	0	0	0	0	0	0	0	0	0	0	88	0	0	0	0	0	0	0	0	0	0	0	0	0	0	0	1	0	0
opportunistic	2	FJ425667	Ascomycota Sordariomycetes Xylariales Xylariaceae	94.444	Otu254	0	0	0	0	0	0	0	0	0	0	0	0	0	0	0	0	0	0	0	0	0	0	0	0	0	0	0	0	0	0	0	0	0	0	0	0	0	15	0	0	0	1
opportunistic	2	HM123327	Ascomycota Sordariomycetes Xylariales Xylariaceae Nemania	94.553	Otu340	0	0	0	0	0	0	0	0	0	0	0	0	0	0	0	0	0	0	0	0	0	0	0	0	0	0	0	0	0	0	0	0	0	0	0	0	0	0	22	1	0	0
opportunistic	2	JQ761857	Ascomycota Sordariomycetes Xylariales Xylariaceae Rosellinia subiculata	87.912	Otu240	48	0	0	0	0	0	0	0	0	0	0	0	0	0	0	0	0	0	0	0	0	2	0	0	0	0	0	0	0	0	0	0	0	0	0	0	0	0	0	0	0	0
opportunistic	2	MG231455	Basidiomycota	90.728	Otu271	0	0	0	0	0	0	0	0	0	0	0	0	0	0	0	0	28	1	0	0	0	0	0	0	0	0	0	0	0	0	0	0	0	0	0	0	0	0	0	0	0	0
opportunistic	2	KP012697	Basidiomycota Agaricomycetes Agaricales Cortinariaceae Gymnopilus	94.702	Otu303	0	0	0	0	0	0	0	0	0	0	0	0	0	0	0	0	0	0	0	0	0	1	0	0	12	0	0	0	0	0	0	0	0	0	0	0	0	0	0	0	0	0
opportunistic	2	KP814307	Basidiomycota Agaricomycetes Hymenochaetales Schizoporaceae Xylodon borealis	80.808	Otu223	0	0	0	58	0	0	0	0	0	0	0	0	0	0	0	0	0	0	0	1	0	0	0	0	0	0	0	0	0	0	0	0	0	0	0	0	0	0	0	0	0	0
opportunistic	2	AF444519	Basidiomycota Agaricostilbomycetes Agaricostilbales Agaricostilbaceae Pseudobensingtonia ingoldii	80.442	Otu305	0	0	0	0	0	0	0	0	0	0	0	0	0	0	0	3	0	30	0	0	0	0	0	0	0	0	0	0	0	0	0	0	0	0	0	0	0	0	0	0	0	0
opportunistic	2	AF444628	Basidiomycota Microbotryomycetes Microbotryomycetes Chrysozymaceae Oberwinklerozyma yarrowii	90.096	Otu247	0	0	0	0	0	0	0	0	0	0	0	0	1	0	0	0	32	0	0	0	0	0	0	0	0	0	0	0	0	0	0	0	0	0	0	0	0	0	0	0	0	0
opportunistic	2	KT328827	Basidiomycota Tremellomycetes Tremellales Cuniculitremaceae Kockovaella	94.275	Otu167	0	0	0	0	0	0	0	0	0	0	0	0	0	0	0	0	72	1	0	0	0	0	0	0	0	0	0	0	0	0	0	0	0	0	0	0	0	0	0	0	0	0
opportunistic	2	AJ601389	Basidiomycota Tremellomycetes Trichosporonales Trichosporonaceae Apiotrichum mycotoxinovorans	90.114	Otu197	0	0	0	0	0	0	0	0	0	0	0	0	0	0	1	0	0	0	0	0	0	0	0	0	0	0	0	0	0	0	0	0	0	0	0	0	0	0	110	0	0	0
opportunistic	2	JF439141	Glomeromycota Glomeromycetes Diversisporales Diversisporaceae Diversispora	93.377	Otu241	0	157	0	0	0	0	0	0	0	0	0	0	0	0	0	0	0	2	0	0	0	0	0	0	0	0	0	0	0	0	0	0	0	0	0	0	0	0	0	0	0	0
opportunistic	2	KJ850196	Glomeromycota Glomeromycetes Diversisporales Diversisporaceae Diversispora insculpta	94.138	Otu297	0	66	0	0	0	0	0	0	0	0	0	0	0	0	0	0	0	0	0	0	0	0	0	0	0	0	0	0	0	0	0	0	0	0	0	0	0	0	0	0	0	1
opportunistic	2	EU350851	Glomeromycota Glomeromycetes Glomerales Glomeraceae	90.052	Otu237	0	0	0	0	0	0	0	0	0	0	0	1	0	0	0	31	0	0	0	0	0	0	0	0	0	0	0	0	0	0	0	0	0	0	0	0	0	0	0	0	0	0
opportunistic	2	HQ895801	Glomeromycota Glomeromycetes Glomerales Glomeraceae	96.04	Otu329	0	0	0	0	0	0	0	0	0	0	0	0	0	0	0	0	0	0	0	0	0	0	0	0	0	0	0	0	0	0	30	0	1	0	0	0	0	0	0	0	0	0
opportunistic	2	JN195708	Glomeromycota Glomeromycetes Glomerales Glomeraceae	94.389	Otu379	16	0	0	0	0	0	0	0	0	0	0	0	0	0	0	0	0	0	0	0	0	0	0	0	0	0	0	0	0	0	0	0	0	0	0	0	0	0	0	0	1	0
opportunistic	2	KM056662	Glomeromycota Glomeromycetes Glomerales Glomeraceae Dominikia aurea	96.441	Otu210	0	0	0	0	0	0	0	0	0	0	0	0	0	0	0	22	0	0	0	0	0	0	0	0	0	0	0	0	0	0	0	0	0	0	0	0	0	0	14	0	0	0
opportunistic	2	FR750196	Glomeromycota Glomeromycetes Glomerales Glomeraceae Rhizophagus irregularis	95.395	Otu189	0	0	0	0	0	0	0	0	0	0	0	0	0	0	0	0	0	0	0	40	0	0	1	0	0	0	0	0	0	0	0	0	0	0	0	0	0	0	0	0	0	0
opportunistic	1	KC898225	Ascomycota Dothideomycetes Botryosphaeriales Botryosphaeriaceae Dothiorella plurivora	98.387	Otu284	0	0	0	0	0	0	0	0	0	0	0	0	0	0	0	12	0	0	0	0	0	0	0	0	0	0	0	0	0	0	0	0	0	0	0	0	0	0	0	0	0	0
opportunistic	1	GQ303268	Ascomycota Dothideomycetes Capnodiales Capnodiaceae Antennariella placitae	97.273	Otu376	0	0	0	0	0	0	0	0	0	0	0	0	0	0	0	0	0	0	0	0	0	0	0	0	0	0	0	0	0	0	0	0	0	0	0	0	4	0	0	0	0	0
opportunistic	1	MG571400	Ascomycota Dothideomycetes Capnodiales Mycosphaerellaceae Mycosphaerella	93.671	Otu359	0	0	0	0	0	0	0	0	0	0	0	0	0	0	0	0	0	0	5	0	0	0	0	0	0	0	0	0	0	0	0	0	0	0	0	0	0	0	0	0	0	0
opportunistic	1	MF683457	Ascomycota Dothideomycetes Dothideales	92.636	Otu323	0	0	0	0	0	0	0	0	0	0	0	0	0	0	0	0	0	0	0	0	0	0	0	0	0	0	0	0	0	0	20	0	0	0	0	0	0	0	0	0	0	0
opportunistic	1	AJ238468	Ascomycota Dothideomycetes Dothideales Dothideales Hortaea werneckii	98.571	Otu389	0	0	0	0	0	0	0	0	0	0	0	0	0	0	0	0	0	0	0	0	0	0	0	0	0	0	0	0	0	0	0	0	0	0	0	0	0	4	0	0	0	0
opportunistic	1	KP843441	Ascomycota Dothideomycetes Pleosporales	90.041	Otu243	0	0	0	0	0	0	0	0	0	0	0	0	0	0	0	0	0	0	0	0	0	0	0	0	0	0	0	0	0	0	0	0	0	0	0	0	9	0	0	0	0	0
opportunistic	1	MK907748	Ascomycota Dothideomycetes Pleosporales	98.12	Otu381	15	0	0	0	0	0	0	0	0	0	0	0	0	0	0	0	0	0	0	0	0	0	0	0	0	0	0	0	0	0	0	0	0	0	0	0	0	0	0	0	0	0
opportunistic	1	JX496094	Ascomycota Dothideomycetes Pleosporales Didymosphaeriaceae Paraphaeosphaeria sardoa	96.761	Otu152	0	0	0	0	0	0	0	0	0	0	0	0	0	0	0	0	0	0	0	0	0	0	0	0	0	0	0	0	0	0	0	0	0	0	0	0	50	0	0	0	0	0
opportunistic	1	UDB0755605	Ascomycota Dothideomycetes Pleosporales Lophiostomataceae Lophiostoma	92.797	Otu221	0	0	0	0	0	0	0	0	0	0	0	0	0	0	0	0	0	0	0	0	0	0	0	0	0	0	0	27	0	0	0	0	0	0	0	0	0	0	0	0	0	0
opportunistic	1	MH855804	Ascomycota Dothideomycetes Pleosporales Periconiaceae Periconia macrospinosa	96.887	Otu330	0	0	0	0	0	0	0	0	0	0	13	0	0	0	0	0	0	0	0	0	0	0	0	0	0	0	0	0	0	0	0	0	0	0	0	0	0	0	0	0	0	0
opportunistic	1	MF683451	Ascomycota Dothideomycetes Pleosporales Phaeosphaeriaceae Phaeosphaeria	93.004	Otu348	0	0	0	0	0	0	0	0	0	0	6	0	0	0	0	0	0	0	0	0	0	0	0	0	0	0	0	0	0	0	0	0	0	0	0	0	0	0	0	0	0	0
opportunistic	1	MF347911	Ascomycota Dothideomycetes Pleosporales Sporormiaceae Preussia	91.566	Otu337	0	0	0	0	0	0	0	0	0	0	0	0	0	0	14	0	0	0	0	0	0	0	0	0	0	0	0	0	0	0	0	0	0	0	0	0	0	0	0	0	0	0
opportunistic	1	AY916468	Ascomycota Dothideomycetes Tubeufiales Tubeufiaceae Helicoma morganii	87.747	Otu211	0	0	0	0	0	0	0	0	0	0	0	0	0	0	0	33	0	0	0	0	0	0	0	0	0	0	0	0	0	0	0	0	0	0	0	0	0	0	0	0	0	0
opportunistic	1	KT328772	Ascomycota Eurotiomycetes Chaetothyriales	92.395	Otu371	0	11	0	0	0	0	0	0	0	0	0	0	0	0	0	0	0	0	0	0	0	0	0	0	0	0	0	0	0	0	0	0	0	0	0	0	0	0	0	0	0	0
opportunistic	1	UDB0212103	Ascomycota Eurotiomycetes Chaetothyriales	95.61	Otu378	0	0	0	0	0	0	0	0	0	0	0	0	0	0	0	0	0	0	0	0	0	0	0	0	0	0	0	0	0	0	0	0	0	0	0	0	6	0	0	0	0	0
opportunistic	1	KC790480	Ascomycota Eurotiomycetes Chaetothyriales Herpotrichiellaceae Exophiala	94.231	Otu282	0	0	0	0	0	0	0	0	0	0	0	0	0	0	0	0	11	0	0	0	0	0	0	0	0	0	0	0	0	0	0	0	0	0	0	0	0	0	0	0	0	0
opportunistic	1	AF050274	Ascomycota Eurotiomycetes Chaetothyriales Herpotrichiellaceae Exophiala salmonis	96.167	Otu351	0	0	0	0	0	0	0	0	0	0	0	0	0	0	0	0	0	0	0	0	0	0	0	0	0	0	0	0	0	5	0	0	0	0	0	0	0	0	0	0	0	0
opportunistic	1	AY354272	Ascomycota Eurotiomycetes Chaetothyriales Herpotrichiellaceae Veronaea	93.75	Otu151	0	0	0	0	0	0	0	0	0	0	0	0	48	0	0	0	0	0	0	0	0	0	0	0	0	0	0	0	0	0	0	0	0	0	0	0	0	0	0	0	0	0
opportunistic	1	GU053988	Ascomycota Eurotiomycetes Eurotiales	100	Otu276	0	0	0	0	0	0	0	0	0	0	0	0	0	0	0	0	0	0	0	0	0	0	0	0	0	0	0	0	0	0	0	0	0	0	0	0	0	19	0	0	0	0
opportunistic	1	EF652074	Ascomycota Eurotiomycetes Eurotiales Aspergillaceae Aspergillus intermedius	99.222	Otu307	0	0	0	0	0	0	0	0	0	0	0	0	0	0	0	0	0	0	0	0	0	0	0	0	0	0	0	0	0	0	0	0	0	0	0	0	0	0	0	12	0	0
opportunistic	1	MH865517	Ascomycota Eurotiomycetes Eurotiales Aspergillaceae Hamigera avellanea	93.443	Otu368	10	0	0	0	0	0	0	0	0	0	0	0	0	0	0	0	0	0	0	0	0	0	0	0	0	0	0	0	0	0	0	0	0	0	0	0	0	0	0	0	0	0
opportunistic	1	KT758135	Ascomycota Eurotiomycetes Eurotiales Aspergillaceae Penicillium	99.225	Otu350	0	0	0	0	0	0	0	0	0	0	0	0	0	0	0	0	0	0	0	0	0	2	0	0	0	0	0	0	0	0	0	0	0	0	0	0	0	0	0	0	0	0
opportunistic	1	JX043002	Ascomycota Lecanoromycetes Ostropales	85.714	Otu390	0	0	0	0	0	0	0	0	0	0	0	0	0	0	0	0	0	0	0	0	0	0	0	0	0	0	0	0	0	0	0	0	0	0	0	0	0	0	0	3	0	0
opportunistic	1	JN859279	Ascomycota Leotiomycetes Helotiales	91.803	Otu386	0	0	0	0	0	0	0	0	0	0	0	0	0	0	0	0	0	0	0	0	0	0	0	0	0	0	0	0	0	0	9	0	0	0	0	0	0	0	0	0	0	0
opportunistic	1	KF874620	Ascomycota Leotiomycetes Helotiales Helotiales Acidomelania panicicola	94.286	Otu279	42	0	0	0	0	0	0	0	0	0	0	0	0	0	0	0	0	0	0	0	0	0	0	0	0	0	0	0	0	0	0	0	0	0	0	0	0	0	0	0	0	0
opportunistic	1	KJ710476	Ascomycota Leotiomycetes Helotiales Helotiales Mastigosporium Mastigosporium album	92.562	Otu338	0	0	0	0	0	0	0	0	0	0	0	0	0	0	0	0	0	0	0	0	0	0	0	0	0	0	0	0	0	0	0	0	0	14	0	0	0	0	0	0	0	0
opportunistic	1	KY574323	Ascomycota Pezizomycetes Pezizales Pyronemataceae	94.444	Otu170	0	0	0	0	0	0	0	0	0	0	0	0	56	0	0	0	0	0	0	0	0	0	0	0	0	0	0	0	0	0	0	0	0	0	0	0	0	0	0	0	0	0
opportunistic	1	LT603053	Ascomycota Saccharomycetes Saccharomycetales Saccharomycetales Candidaalbicans	100	Otu233	0	0	0	0	0	0	0	0	0	0	0	0	0	0	0	0	0	0	0	0	0	0	0	0	0	0	0	22	0	0	0	0	0	0	0	0	0	0	0	0	0	0
opportunistic	1	MF692977	Ascomycota Sordariomycetes	91.912	Otu259	0	0	0	0	0	0	0	0	0	0	0	0	0	0	0	0	0	0	0	0	0	0	0	0	0	0	0	0	0	0	0	0	0	0	0	28	0	0	0	0	0	0
opportunistic	1	MH003390	Ascomycota Sordariomycetes	90.152	Otu352	0	0	0	0	0	0	0	0	0	0	0	0	0	0	0	0	0	0	0	0	0	0	0	0	0	0	0	0	0	0	0	0	0	0	7	0	0	0	0	0	0	0
opportunistic	1	KX986013	Ascomycota Sordariomycetes	96.748	Otu387	0	0	0	0	0	0	0	0	0	0	0	0	0	0	0	0	0	0	0	0	0	0	0	0	0	0	0	0	0	0	0	0	3	0	0	0	0	0	0	0	0	0
opportunistic	1	JX243880	Ascomycota Sordariomycetes Chaetosphaeriales	88.571	Otu316	0	0	0	0	0	0	0	0	0	0	0	0	0	8	0	0	0	0	0	0	0	0	0	0	0	0	0	0	0	0	0	0	0	0	0	0	0	0	0	0	0	0
opportunistic	1	KP714315	Ascomycota Sordariomycetes Diaporthales Diaporthaceae Diaporthe citri	98.008	Otu246	0	0	0	0	0	0	0	0	0	0	0	0	0	27	0	0	0	0	0	0	0	0	0	0	0	0	0	0	0	0	0	0	0	0	0	0	0	0	0	0	0	0
opportunistic	1	MF190126	Ascomycota Sordariomycetes Diaporthales Valsaceae Cytospora junipericola	91.358	Otu324	0	0	0	0	0	0	0	0	0	0	0	0	0	0	0	0	0	0	0	0	0	0	0	0	0	0	0	0	0	0	0	0	0	0	0	0	7	0	0	0	0	0
opportunistic	1	HG937101	Ascomycota Sordariomycetes Hypocreales	97.872	Otu355	11	0	0	0	0	0	0	0	0	0	0	0	0	0	0	0	0	0	0	0	0	0	0	0	0	0	0	0	0	0	0	0	0	0	0	0	0	0	0	0	0	0
opportunistic	1	LN997710	Ascomycota Sordariomycetes Hypocreales Clavicipitaceae Metarhizium	85.053	Otu198	0	0	0	0	0	0	0	0	0	0	0	0	27	0	0	0	0	0	0	0	0	0	0	0	0	0	0	0	0	0	0	0	0	0	0	0	0	0	0	0	0	0
opportunistic	1	KJ872825	Ascomycota Sordariomycetes Hypocreales Clavicipitaceae Metarhizium	88.693	Otu295	0	0	0	0	0	0	0	0	0	0	0	0	0	0	0	0	0	0	0	0	0	0	0	0	0	0	0	0	10	0	0	0	0	0	0	0	0	0	0	0	0	0
opportunistic	1	KU534781	Ascomycota Sordariomycetes Hypocreales Hypocreaceae	100	Otu380	10	0	0	0	0	0	0	0	0	0	0	0	0	0	0	0	0	0	0	0	0	0	0	0	0	0	0	0	0	0	0	0	0	0	0	0	0	0	0	0	0	0
opportunistic	1	AJ230667	Ascomycota Sordariomycetes Hypocreales Hypocreaceae Trichoderma appalachiense	99.248	Otu275	0	0	0	0	0	0	0	0	0	0	0	0	0	0	0	0	0	0	0	0	0	0	0	0	0	0	0	0	0	0	0	0	0	0	0	0	0	0	36	0	0	0
opportunistic	1	HG965029	Ascomycota Sordariomycetes Hypocreales Hypocreales Sarocladium pseudostrictum	95.833	Otu317	0	0	0	0	0	0	0	0	0	0	0	0	0	0	0	13	0	0	0	0	0	0	0	0	0	0	0	0	0	0	0	0	0	0	0	0	0	0	0	0	0	0
opportunistic	1	MK876384	Ascomycota Sordariomycetes Hypocreales Nectriaceae Cylindrium grande	98.354	Otu186	0	0	0	0	0	0	0	0	0	0	0	0	0	49	0	0	0	0	0	0	0	0	0	0	0	0	0	0	0	0	0	0	0	0	0	0	0	0	0	0	0	0
opportunistic	1	KF914458	Ascomycota Sordariomycetes Hypocreales Nectriaceae Fusarium	98.099	Otu300	0	0	0	0	0	0	0	0	0	0	0	0	0	0	0	0	0	0	0	0	0	0	0	0	0	0	0	12	0	0	0	0	0	0	0	0	0	0	0	0	0	0
opportunistic	1	EU926252	Ascomycota Sordariomycetes Hypocreales Nectriaceae Fusarium biseptatum	96.923	Otu334	0	0	0	0	0	0	0	0	0	0	0	0	0	0	0	0	0	0	0	0	0	0	0	0	0	0	0	0	0	7	0	0	0	0	0	0	0	0	0	0	0	0
opportunistic	1	FJ748921	Ascomycota Sordariomycetes Melanosporales Melanosporaceae Melanospora Melanospora tiffanyae	95.528	Otu117	0	0	0	0	0	0	0	0	0	0	0	0	0	99	0	0	0	0	0	0	0	0	0	0	0	0	0	0	0	0	0	0	0	0	0	0	0	0	0	0	0	0
opportunistic	1	HQ607955	Ascomycota Sordariomycetes Sordariales Sordariaceae	96.604	Otu327	22	0	0	0	0	0	0	0	0	0	0	0	0	0	0	0	0	0	0	0	0	0	0	0	0	0	0	0	0	0	0	0	0	0	0	0	0	0	0	0	0	0
opportunistic	1	JX298908	Ascomycota Sordariomycetes Xylariales	98.63	Otu306	0	0	0	0	0	0	0	0	0	0	0	0	0	0	0	0	0	0	13	0	0	0	0	0	0	0	0	0	0	0	0	0	0	0	0	0	0	0	0	0	0	0
opportunistic	1	KF385360	Ascomycota Sordariomycetes Xylariales	93.609	Otu367	0	0	0	0	0	0	0	0	0	0	0	0	0	0	0	0	0	0	0	0	0	0	0	0	0	0	0	0	0	0	0	0	0	0	7	0	0	0	0	0	0	0
opportunistic	1	UDB0418377	Ascomycota Sordariomycetes Xylariales Microdochiaceae Idriella	98.131	Otu264	0	0	0	0	0	0	0	0	0	0	0	0	0	0	0	0	0	0	0	0	15	0	0	0	0	0	0	0	0	0	0	0	0	0	0	0	0	0	0	0	0	0
opportunistic	1	JN198518	Ascomycota Sordariomycetes Xylariales Sporocadaceae Seiridium ceratosporum	98.785	Otu255	0	0	0	0	0	0	0	0	0	0	0	0	0	0	0	0	0	0	0	0	0	0	0	0	0	0	0	0	0	0	0	0	0	0	0	0	0	13	0	0	0	0
opportunistic	1	LM652486	Ascomycota	98.233	Otu328	0	0	0	0	0	0	0	0	0	0	0	0	0	0	0	0	0	0	0	0	0	6	0	0	0	0	0	0	0	0	0	0	0	0	0	0	0	0	0	0	0	0
opportunistic	1	JF727848	Basidiomycota Agaricomycetes Agaricales Agaricaceae Agaricus	97.627	Otu344	0	0	0	0	0	0	0	0	0	0	0	0	0	0	0	0	0	0	0	0	0	0	0	0	0	0	0	0	0	0	22	0	0	0	0	0	0	0	0	0	0	0
opportunistic	1	JN572905	Basidiomycota Agaricomycetes Agaricales Lycoperdaceae Lycoperdon muscorum	92.763	Otu229	0	59	0	0	0	0	0	0	0	0	0	0	0	0	0	0	0	0	0	0	0	0	0	0	0	0	0	0	0	0	0	0	0	0	0	0	0	0	0	0	0	0
opportunistic	1	KP012978	Basidiomycota Agaricomycetes Agaricales Stephanosporaceae Lindtneria	93.353	Otu383	0	0	0	0	0	0	0	0	0	0	0	0	0	0	0	0	4	0	0	0	0	0	0	0	0	0	0	0	0	0	0	0	0	0	0	0	0	0	0	0	0	0
opportunistic	1	AB512316	Basidiomycota Agaricomycetes Agaricales Tricholomataceae Calyptella	89.761	Otu346	0	0	0	0	0	0	0	0	0	0	0	0	0	0	0	0	0	0	0	0	0	0	0	0	0	0	0	0	0	0	0	0	0	0	0	0	7	0	0	0	0	0
opportunistic	1	UDB0524273	Basidiomycota Agaricomycetes Gomphales Gomphaceae Phaeoclavulina abietina	93.077	Otu370	13	0	0	0	0	0	0	0	0	0	0	0	0	0	0	0	0	0	0	0	0	0	0	0	0	0	0	0	0	0	0	0	0	0	0	0	0	0	0	0	0	0
opportunistic	1	FN907912	Basidiomycota Agaricomycetes Hymenochaetales Schizoporaceae Schizopora paradoxa	89.825	Otu358	0	0	0	0	0	0	0	0	0	0	0	0	0	5	0	0	0	0	0	0	0	0	0	0	0	0	0	0	0	0	0	0	0	0	0	0	0	0	0	0	0	0
opportunistic	1	JN182874	Basidiomycota Agaricomycetes Phallales Phallaceae	96.774	Otu372	0	0	0	0	0	0	0	0	0	0	0	0	2	0	0	0	0	0	0	0	0	0	0	0	0	0	0	0	0	0	0	0	0	0	0	0	0	0	0	0	0	0
opportunistic	1	HQ225492	Basidiomycota Agaricomycetes Polyporales Polyporaceae Polyporus umbellatus	91.582	Otu272	0	0	0	0	0	0	0	0	0	0	0	0	0	0	0	0	0	0	0	0	0	0	0	0	0	0	0	0	28	0	0	0	0	0	0	0	0	0	0	0	0	0
opportunistic	1	JN164989	Basidiomycota Agaricomycetes Polyporales Polyporaceae Trametes cubensis	95.876	Otu238	0	0	0	0	0	0	0	0	0	0	0	0	23	0	0	0	0	0	0	0	0	0	0	0	0	0	0	0	0	0	0	0	0	0	0	0	0	0	0	0	0	0
opportunistic	1	KX398722	Basidiomycota Agaricomycetes Thelephorales Thelephoraceae	97.619	Otu342	0	0	22	0	0	0	0	0	0	0	0	0	0	0	0	0	0	0	0	0	0	0	0	0	0	0	0	0	0	0	0	0	0	0	0	0	0	0	0	0	0	0
opportunistic	1	KX079906	Basidiomycota Cystobasidiomycetes Cystobasidiales Cystobasidiaceae Cystobasidium slooffiae	97.288	Otu391	0	0	0	0	0	0	0	0	0	0	0	0	0	0	0	0	0	0	0	0	0	0	0	0	0	0	0	0	0	0	0	0	0	0	0	0	0	0	0	0	0	15
opportunistic	1	KY103394	Basidiomycota Cystobasidiomycetes Erythrobasidiales Erythrobasidiaceae Erythrobasidium yunnanense	98.252	Otu258	0	0	0	0	0	0	0	0	0	0	0	0	0	0	0	0	0	0	0	0	0	0	0	0	0	0	0	0	0	0	0	0	0	0	0	0	0	0	0	34	0	0
opportunistic	1	KF225903	Basidiomycota Tremellomycetes	98.378	Otu239	65	0	0	0	0	0	0	0	0	0	0	0	0	0	0	0	0	0	0	0	0	0	0	0	0	0	0	0	0	0	0	0	0	0	0	0	0	0	0	0	0	0
opportunistic	1	MN244416	Basidiomycota Tremellomycetes Tremellales	96.691	Otu176	0	0	0	0	0	0	0	0	0	0	0	0	0	0	0	0	49	0	0	0	0	0	0	0	0	0	0	0	0	0	0	0	0	0	0	0	0	0	0	0	0	0
opportunistic	1	AF444460	Basidiomycota Tremellomycetes Tremellales Cuniculitremaceae Kockovaella chinensis	94.318	Otu262	0	0	0	0	0	0	0	0	0	0	0	0	0	0	0	0	20	0	0	0	0	0	0	0	0	0	0	0	0	0	0	0	0	0	0	0	0	0	0	0	0	0
opportunistic	1	KF192054	Basidiomycota Tremellomycetes Tremellales Tremellaceae Cryptococcus	83.794	Otu274	0	0	0	0	0	0	0	0	0	0	0	0	0	0	0	0	19	0	0	0	0	0	0	0	0	0	0	0	0	0	0	0	0	0	0	0	0	0	0	0	0	0
opportunistic	1	KJ409878	Basidiomycota Wallemiomycetes Wallemiales Wallemiaceae Wallemia tropicalis	97.436	Otu168	0	0	0	0	0	0	0	0	0	0	0	0	43	0	0	0	0	0	0	0	0	0	0	0	0	0	0	0	0	0	0	0	0	0	0	0	0	0	0	0	0	0
opportunistic	1	JF439144	Glomeromycota Glomeromycetes Diversisporales Diversisporaceae	95.862	Otu172	131	0	0	0	0	0	0	0	0	0	0	0	0	0	0	0	0	0	0	0	0	0	0	0	0	0	0	0	0	0	0	0	0	0	0	0	0	0	0	0	0	0
opportunistic	1	KM056665	Glomeromycota Glomeromycetes Glomerales Glomeraceae Dominikia aurea	97.491	Otu273	0	0	0	0	0	0	0	0	0	0	0	0	0	0	0	0	0	0	0	0	0	0	0	0	0	0	0	0	0	0	0	0	0	0	0	0	0	0	48	0	0	0
opportunistic	1	KF836951	Glomeromycota Glomeromycetes Glomerales Glomeraceae Glomus	97.518	Otu301	0	0	0	0	0	0	0	0	0	0	0	0	0	0	0	0	0	0	0	0	0	0	0	0	0	0	0	0	0	0	0	0	0	0	0	0	0	0	0	0	0	23
opportunistic OTUs were excluded in community analyses

## Sheet: grouping
sample	age	time
pb1	10	MayA
pb2	10	MayA
pb3	10	MayA
pb4	10	MayA
pb5	10	MayA
pb6	10	MayA
pb13	25	MayB
pb14	25	MayB
pb15	25	MayB
pb16	25	MayB
pb17	25	MayB
pb18	25	MayB
pb25	55	Jun
pb26	55	Jun
pb27	55	Jun
pb28	55	Jun
pb29	55	Jun
pb30	55	Jun
pb37	85	Jul
pb38	85	Jul
pb39	85	Jul
pb40	85	Jul
pb41	85	Jul
pb42	85	Jul
pb49	115	Aug
pb50	115	Aug
pb51	115	Aug
pb52	115	Aug
pb53	115	Aug
pb54	115	Aug
pb61	145	Sep
pb62	145	Sep
pb63	145	Sep
pb64	145	Sep
pb65	145	Sep
pb66	145	Sep
pb73	175	Oct
pb74	175	Oct
pb75	175	Oct
pb76	175	Oct
pb77	175	Oct
pb78	175	Oct
